# Supplementary material for: 交通工学研究会の取り組み(講習会・セミナーなど) (特集 交通技術者教育)
Source: publisher site journal article supplement (doi:10.1515/fhep-2017-0031), 2010-01-01
Supplement: Supplementary file 1 [file j_fhep-2017-0031_suppl.docx]

# **Online Appendix**

1. **Robustness Checks**

| 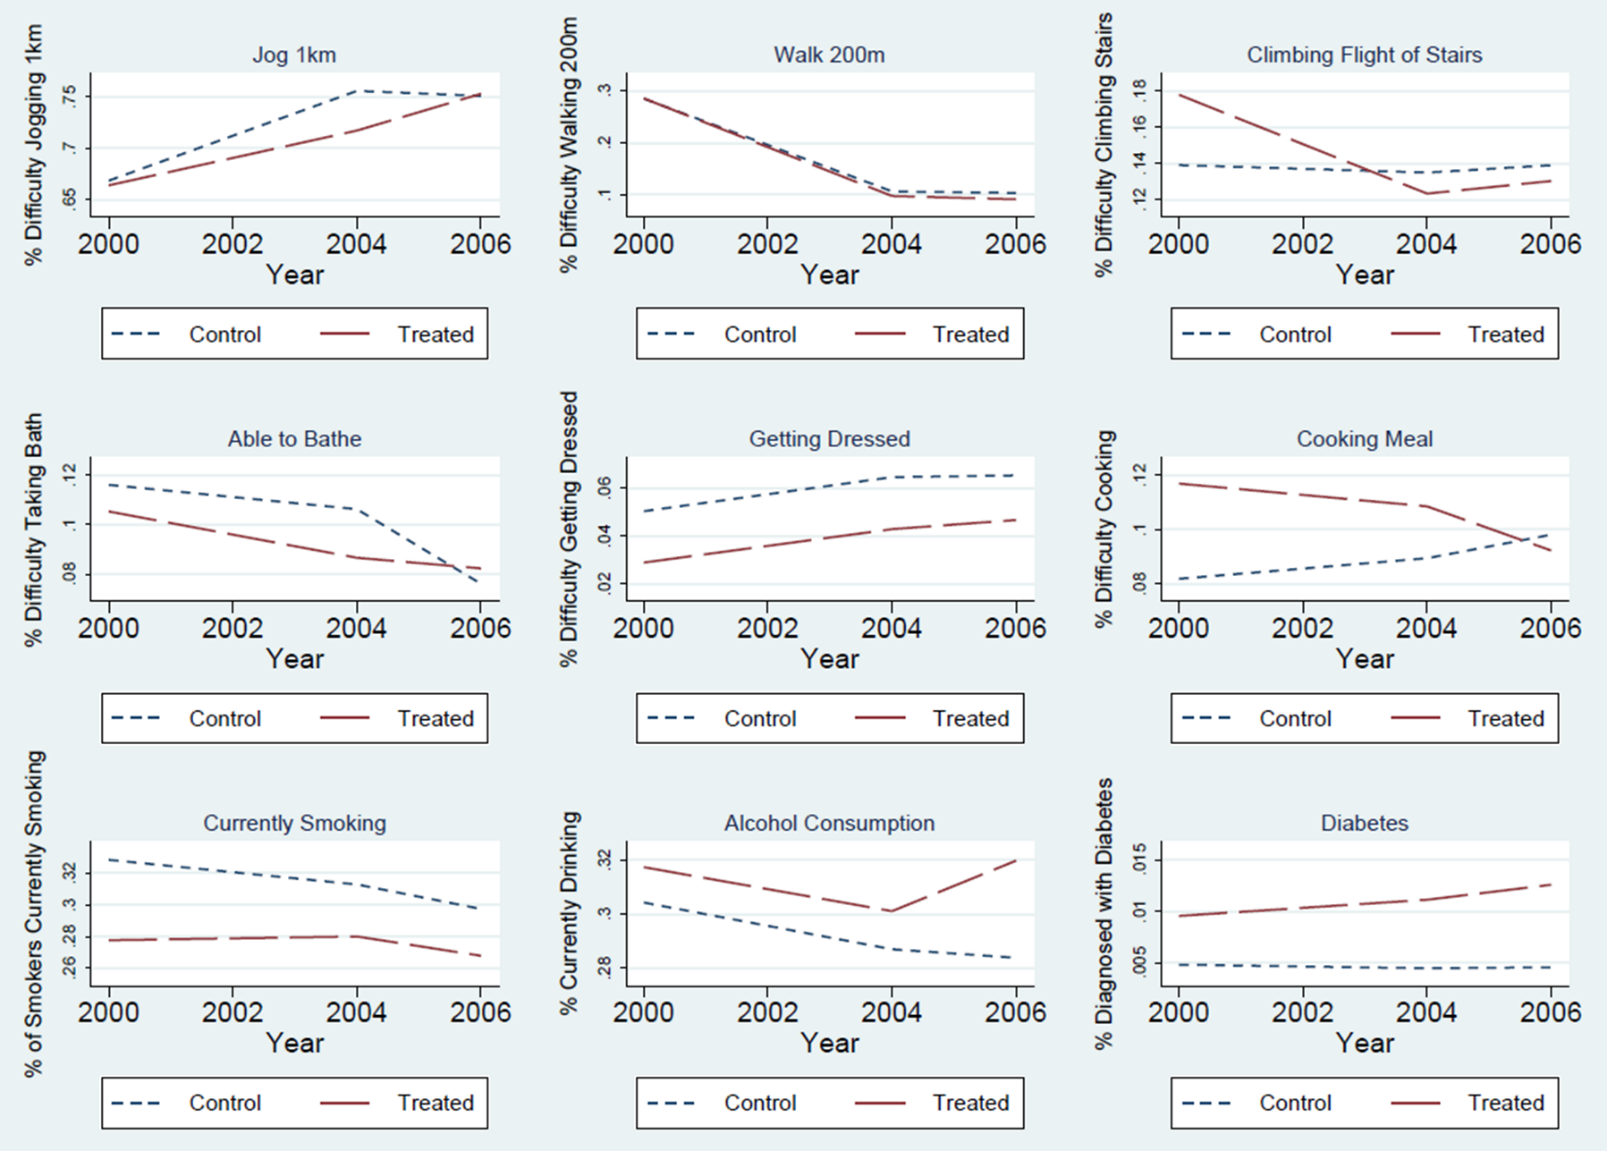 |
| --- |
| **Fig A.1.** CHNS Trends, 2000-2006. Notes: Time-series plots of outcomes in treated and non-treated provinces. The control provinces are Hunan and Guizhou and were determined based on our CHARLS sample. The reason is that CHNS doesn't observe NRPS participation directly and does not report actual Rural and Urban Hukou districts. Source: CHNS Waves 2000, 2004 and 2006, own calculations. |

# **Table A.1:** PCA Weights (Component Loadings).

| Panel A (Direct Measures): | **Mobility Index a** | | **Affect Index a** | | **Vision Index b** | |
| --- | --- | --- | --- | --- | --- | --- |
|  | **Variable** | **Loading** | **Variable** | **Loading** | **Variable** | **Loading** | |
|  | Difficulty Jog 1km | 0.584 | Everything Mostly an Effort | 0.608 | Long Distance Vision | 0.707 | |
|  | Difficulty Walk 100m | 0.564 | Rarely Happy | 0.510 | Short Distance Vision | 0.707 | |
|  | Difficulty Climb Flight of Stairs | 0.584 | Mostly Lonely | 0.608 |  |  | |
|  |  |  |  |  |  |  | |
| Panel B (Indirect Measures): | **Self-Care Index a** | | **Usual Activities Index a** | | **Social Interactions Index b** | |
|  | **Variable** | **Loading** | **Variable** | **Loading** | **Variable** | **Loading** | |
|  | Difficulty Getting Dressed | 0.595 | Difficulty Preparing Hot Meals | 0.601 | Contact with Parents or In-Laws | 0.254 | |
|  | Difficulty Taking Bath | 0.597 | Difficulty Grocery Shopping | 0.533 | Contact with Child over Phone/Email | 0.696 | |
|  | Difficulty Eating | 0.538 | Difficulty Cleaning House | 0.596 | Contact with Child in Person/Phone/ Email | 0.672 | |
| Notes:(a) Measured in terms of difficulty. Low (or Negative) values denote less difficulty in the health domain. (b) Positively coded where Higher values denote better vision and social interaction. | | | | | | |

# **Table A.2:** Test of Common Trends Using CHNS Data.

|  | **Direct Measures** | | | **Indirect Measures** | | | **Health Behavior and Disease State** | | |
| --- | --- | --- | --- | --- | --- | --- | --- | --- | --- |
|  | **Diff Jog 1km (Yes=1)** | **Diff Walk 200m (Yes=1)** | **Diff Climb Flight of Stairs (Yes=1)** | **Diff Getting Dressed (Yes=1)** | **Diff Taking Bath (Yes=1)** | **Diff Preparing Hot Meals (Yes=1)** | **Currently Smoking (Yes=1)** | **Drink Alcohol in Past Year (Yes=1)** | **Ever Diagnosed w/ Diabetes (Yes=1)** |
|  | (1) | (2) | (3) | (4) | (5) | (6) | (7) | (8) | (9) |
|  |  |  |  |  |  |  |  |  |  |
| Treatment * 2000 | 0.007 (0.053) | -0.004 (0.065) | 0.034 (0.036) | 0.001 (0.024) | 0.009 (0.032) | 0.010  (0.026) | -0.023  (0.018) | -0.001 (0.023) | -0.001  (0.004) |
| Treatment * 2006 | 0.010 (0.049) | -0.026 (0.024) | -0.015 (0.029) | -0.013 (0.021) | 0.007 (0.022) | -0.037  (0.024) | 0.005  (0.018) | 0.024 (0.018) | 0.003  (0.003) |
| R-Squared Adj | 0.077 | 0.057 | 0.036 | 0.022 | 0.066 | 0.023 | 0.017 | 0.017 | 0.019 |
| Year FE | Yes | Yes | Yes | Yes | Yes | Yes | Yes | Yes | Yes |
| Community FE | Yes | Yes | Yes | Yes | Yes | Yes | Yes | Yes | Yes |
| Observations | 4,666 | 4,077 | 4,885 | 4,907 | 4,903 | 4,879 | 16,716 | 16,695 | 16,519 |
| Notes:Base year is 2004. Columns 1-9 are estimated using OLS. Clustered standard errors at the community level reported in parenthesis. *p< 0.10, **p< 0.05, ***p< 0.01. | | | | | | | | | |

# **Table A.3**: Falsification Test Using Urban Sample.

| Panel A (Health Status and Domains): | ***At Least Good* Health Status (Yes=1)** | **Mobility Index a** | **Affect Index a** | **Vision Index b** | **Self-Care Index a** | **Usual Activities Index a** | **Social Interaction Index b** |
| --- | --- | --- | --- | --- | --- | --- | --- |
|  | (1) | (2) | (3) | (4) | (5) | (6) | (7) |
|  |  |  |  |  |  |  |  |
| Offered NRPS * Above60c | 0.013  (0.128) | -0.169  (0.303) | -0.113  (0.199) | 0.240 (0.237) | -0.333* (0.183) | -0.263 (0.217) | -0.236  (0.337) |
| Baseline Mean | 0.253 | 0.000 | 0.000 | 0.000 | 0.000 | 0.000 | 0.000 |
| Controls | Yes | Yes | Yes | Yes | Yes | Yes | Yes |
| R-squared | 0.340 | 0.427 | 0.317 | 0.350 | 0.391 | 0.324 | 0.513 |
| Observations | 520 | 585 | 548 | 558 | 609 | 614 | 261 |
|  |  |  |  |  |  |  |  |
| Panel B (Health Behavior, Healthcare Utilization and Disease States): | **Health Behavior** | | | | **Healthcare Utilization** |  | **Disease State** |
|  | **Currently Smoking (Yes=1)** | **Drink Alcohol in Past Year (Yes=1)** | **Drink Regularly in Past Year (Yes=1)** | **Underweight (Yes=1)** | **Hospital Visit Last Year (Yes=1)** | **Doctor Visit Last Month (Yes=1)** | **Diagnosed w/ Diabetes Past Year (Yes=1)** |
|  | (1) | (2) | (3) | (4) | (5) | (6) | (7) |
| Offered NRPS * Above60c | 0.023  (0.075) | -0.038  (0.073) | 0.013  (0.049) | -0.024 (0.026) | 0.045  (0.069) | -0.030 (0.067) | 0.022  (0.032) |
| Baseline Mean | 0.253 | 0.331 | 0.187 | 0.070 | 0.111 | 0.201 | 0.019 |
| Controls | Yes | Yes | Yes | Yes | Yes | Yes | Yes |
| R-squared | 0.465 | 0.483 | 0.450 | 0.409 | 0.310 | 0.373 | 0.280 |
| Observations | 543 | 618 | 599 | 370 | 617 | 595 | 443 |
| Notes*:* (a) Measured in terms of difficulty. Low (or Negative) values denote less difficulty in the health domain. (b) Positively coded where Higher values denote better function. (c) The DDD coefficient (Policy instrument interacted with an indicator for participating in urban pension). A significant coefficient suggests the differential treatment towards Urban pensioners in treated communities; a cause concern for the instrument's validity. Also note that Long and Short Distance Vision are indicator variables equal to 1 if either is reported as At Least Good. Individual level controls: Age, Age Squared, Marital Status (=1 if Married), Gender (=1 if Female), Education Levels (Base Group is illiterate with no formal education), # of Household Residents. Panel A and Panel B are estimated using Ordinary Least Squares (OLS) with Community, Year and Community*Year FE. Clustered standard errors at the community level reported in parenthesis. *p< 0.10, **p< 0.05, ***p< 0.01. | | | | | | | |

# **Table A.4:** Test on Placebo Outcomes for Specifications (2) and (3).

|  | **Nationality (Han =1)** | **Daughters (#)** | **Sons (#)** |
| --- | --- | --- | --- |
|  | (1) | (2) | (3) |
| Panel A (ITT): |  |  |  |
| Offered NRPS * Above60 a | -0.003  (0.003) | 0.002  (0.025) | 0.014  (0.021) |
| Baseline Mean | 0.920 | 1.299 | 1.466 |
| Controls | Yes | Yes | Yes |
| R-squared | 0.664 | 0.158 | 0.219 |
| Observations | 24684 | 26379 | 26379 |
| Panel B (TOT): |  |  |  |
| NRPS Participation * Above60 b | -0.006  (0.013) | 0.003  (0.056) | 0.026  (0.066) |
| Baseline Mean | 0.920 | 1.299 | 1.466 |
| Controls | Yes | Yes | Yes |
| F-Stat (First Stage) | 310.46 | 308.04 | 308.04 |
| R-squared | 0.664 | 0.159 | 0.219 |
| Observations | 24,684 | 26,379 | 26,379 |
| Notes*:* (a) Our DDD coefficient (Policy instrument interacted with an indicator for being over 60 years old). The control group becomes individuals under the Age of 60 living in eligible communities that didn’t offer NRPS between 2011 and 2013. (b) Individual participation instrumented with the policy variable. Individual level controls: Marital Status (=1 if Married), Gender (=1 if Female), Education Levels (Base Group is illiterate with no formal education), # of Household Residents. Panel A is estimated using Ordinary Least Squares (OLS) with Community, Year and Community*Year FE. Panel B is estimated using Two-Stage Least Squares (2SLS) with Community, Year and Community*Year FE. Clustered standard errors at the community level reported in parenthesis. *p< 0.10, **p< 0.05, ***p< 0.01. | | | |

# **Table A.5:** ITT and LATE Estimates for Additional Health Outcomes.

|  | **Mobility** | | **Affect** | | **Self-Care** | | **Usual-Activities** | |
| --- | --- | --- | --- | --- | --- | --- | --- | --- |
|  | **Diff Stoop/Kneel (Yes=1)** | **Diff Standing After Sitting for Long (Yes=1)** | **Mostly Depressed (Yes=1)** | **Mostly Bothered by Little Things (Yes=1)** | **Diff Getting Out of Bed (Yes=1)** | **Diff Using Toilet (Yes=1)** | **Diff Manage Money (Yes=1)** | **Diff Taking Meds (Yes=1)** |
|  | (1) | (2) | (3) | (4) | (5) | (6) | (7) | (8) |
| Panel A (ITT): |  |  |  |  |  |  |  |  |
| Offered NRPS * Above60 a | -0.039***  (0.012) | 0.003  (0.006) | -0.005 (0.010) | -0.003  (0.009) | -0.027*** (0.008) | -0.021**  (0.009) | -0.019** (0.009) | -0.023*** (0.007) |
| Baseline Mean | 0.326 | 0.049 | 0.140 | 0.120 | 0.062 | 0.126 | 0.132 | 0.065 |
| Controls | Yes | Yes | Yes | Yes | Yes | Yes | Yes | Yes |
| R-squared | 0.140 | 0.077 | 0.101 | 0.092 | 0.095 | 0.130 | 0.145 | 0.093 |
| Observations | 26,045 | 23,503 | 23,493 | 23,435 | 25,957 | 25,955 | 26,037 | 26,135 |
|  |  |  |  |  |  |  |  |  |
| Panel B (TOT): |  |  |  |  |  |  |  |  |
| NRPS Participation * Above60 b | -0.089***  (0.027) | 0.007  (0.014) | -0.012 (0.023) | -0.007  (0.020) | -0.060***  (0.017) | -0.048** (0.021) | -0.044** (0.020) | -0.053*** (0.016) |
| Baseline Mean | 0.326 | 0.049 | 0.140 | 0.120 | 0.062 | 0.126 | 0.132 | 0.065 |
| Controls | Yes | Yes | Yes | Yes | Yes | Yes | Yes | Yes |
| F-Stat (First Stage) | 313.03 | 301.77 | 307.10 | 312.41 | 313.64 | 313.39 | 313.61 | 311.38 |
| R-squared | 0.139 | 0.077 | 0.101 | 0.092 | 0.094 | 0.130 | 0.145 | 0.092 |
| Observations | 26,045 | 23,503 | 23,493 | 23,435 | 25,957 | 25,955 | 26,037 | 26,135 |
| Notes:(a) Our DDD coefficient (Policy instrument interacted with an indicator for being over 60 years old). The control group becomes individuals under the Age of 60 living in eligible communities that didn’t offer NRPS between 2011 and 2013. (b) Individual participation instrumented with the policy variable. Individual level controls: Marital Status (=1 if Married), Gender (=1 if Female), Education Levels (Base Group is illiterate with no formal education), # of Household Residents. Panel A is estimated using Ordinary Least Squares (OLS) with Community, Year and Community*Year FE. Panel B is estimated using Two-Stage Least Squares (2SLS) with Community, Year and Community*Year FE. Clustered standard errors at the community level reported in parenthesis. *p< 0.10, **p< 0.05, ***p< 0.01. | | | | | | | | |

1. **Additional Robustness Checks**

# **Table B.1:** ITT and LATE Estimates on Direct Measures of Health using Propensity Score for NRPS Participation.

|  | **Self-Reported Overall** | | **Mobility** | | | | | | | | **Affect** | | | | | | | | **Vision** | | | | | |
| --- | --- | --- | --- | --- | --- | --- | --- | --- | --- | --- | --- | --- | --- | --- | --- | --- | --- | --- | --- | --- | --- | --- | --- | --- |
|  | ***At Least Good* Health Status (Yes=1)** | | **Diff Jog 1km (Yes=1)** | | **Diff Walk 100m (Yes=1)** | | **Diff Climb Flight of Stairs (Yes=1)** | | **Mobility Index** | | **Everything Mostly an Effort (Yes=1)** | | **Rarely Happy (Yes=1)** | | **Mostly Lonely (Yes=1)** | | **Affect Index a** | | **Long Distance Vision** | | **Short Distance Vision** | | **Vision Index b** | |
|  | (1) | | (2) | | (3) | | (4) | | (5) | | (6) | | (7) | | (8) | | (9) | | (10) | | (11) | | (12) | |
| Panel A (ITT): |  | |  | |  | |  | |  | |  | |  | |  | |  | |  | |  | |  | |
|  | **NRPS (=1 if Propensity >= Mean + .5 SD)** | | | | | | | | | | | | | | | | | | | | | | | |
| Offered NRPS *Above60c | 0.033** (0.015) | | -0.019 (0.022) | | -0.019 (0.012) | | -0.063*** (0.018) | | -0.122** (0.051) | | -0.015 (0.012) | | -0.010 (0.014) | | 0.011 (0.009) | | -0.014 (0.038) | | 0.054** (0.021) | | 0.025 (0.016) | | 0.116** (0.047) | |
| Baseline Mean | 0.252 | | 0.543 | | 0.172 | | 0.427 | | 0.000 | | 0.167 | | 0.248 | | 0.079 | | 0.000 | | 0.353 | | 0.328 | | 0.000 | |
| Controls | Yes | | Yes | | Yes | | Yes | | Yes | | Yes | | Yes | | Yes | | Yes | | Yes | | Yes | | Yes | |
| R-squared | 0.057 | | 0.135 | | 0.097 | | 0.096 | | 0.164 | | 0.049 | | 0.066 | | 0.056 | | 0.080 | | 0.081 | | 0.049 | | 0.079 | |
| Observations | 19,374 | | 18,764 | | 19,236 | | 18,951 | | 18,472 | | 17,730 | | 17,810 | | 17,776 | | 17,571 | | 18,087 | | 18,090 | | 18,074 | |
|  |  | |  | |  | |  | |  | |  | |  | |  | |  | |  | |  | |  | |
|  | **NRPS (=1 if Propensity >= Mean + 1 SD)** | | | | | | | | | | | | | | | | | | | | | | | |
| Offered NRPS * Above60c | 0.028** (0.014) | | -0.017 (0.019) | | -0.018 (0.011) | | -0.062*** (0.016) | | -0.116** (0.046) | | -0.020* (0.011) | | -0.009 (0.014) | | 0.008 (0.009) | | -0.029 (0.035) | | 0.050** (0.019) | | 0.027* (0.015) | | 0.114*** (0.043) | |
| Baseline Mean | 0.252 | | 0.543 | | 0.172 | | 0.427 | | 0.000 | | 0.167 | | 0.248 | | 0.079 | | 0.000 | | 0.353 | | 0.328 | | 0.000 | |
| Controls | Yes | | Yes | | Yes | | Yes | | Yes | | Yes | | Yes | | Yes | | Yes | | Yes | | Yes | | Yes | |
| R-squared | 0.061 | | 0.133 | | 0.095 | | 0.096 | | 0.160 | | 0.050 | | 0.068 | | 0.056 | | 0.082 | | 0.086 | | 0.048 | | 0.080 | |
| Observations | 20,926 | | 20,270 | | 20,780 | | 20,476 | | 19,962 | | 19,181 | | 19,263 | | 19,223 | | 19,003 | | 19,557 | | 19,559 | | 19,542 | |
|  |  | |  | |  | |  | |  | |  | |  | |  | |  | |  | |  | |  | |
| Panel B (TOT): |  | |  | |  | |  | |  | |  | |  | |  | |  | |  | |  | |  | |
|  | **NRPS (=1 if Propensity >= Mean + .5 SD)** | | | | | | | | | | | | | | | | | | | | | | | |
| PrNRPS *Above60d | | 0.068** (0.030) | | -0.039 (0.043) | | -0.039 (0.025) | | -0.129*** (0.036) | | -0.247** (0.102) | | -0.032 (0.026) | | -0.021 (0.029) | | 0.022 (0.020) | | -0.028 (0.078) | | 0.111** (0.045) | | 0.051 (0.032) | | 0.239** (0.098) | | |
| Baseline Mean | 0.252 | | 0.543 | | 0.172 | | 0.427 | | 0.000 | | 0.167 | | 0.248 | | 0.079 | | 0.000 | | 0.353 | | 0.328 | | 0.000 | |
| Controls | Yes | | Yes | | Yes | | Yes | | Yes | | Yes | | Yes | | Yes | | Yes | | Yes | | Yes | | Yes | |
| F-Stat (First Stage) | 571.95 | | 582.62 | | 574.71 | | 548.72 | | 556.01 | | 586.51 | | 587.17 | | 583.51 | | 582.78 | | 572.44 | | 572.39 | | 570.84 | |
| R-squared | 0.056 | | 0.135 | | 0.095 | | 0.090 | | 0.161 | | 0.049 | | 0.066 | | 0.056 | | 0.080 | | 0.077 | | 0.048 | | 0.076 | |
| Observations | 19,374 | | 18,764 | | 19,236 | | 18,951 | | 18,472 | | 17,730 | | 17,810 | | 17,776 | | 17,571 | | 18,087 | | 18,090 | | 18,074 | |
|  |  | |  | |  | |  | |  | |  | |  | |  | |  | |  | |  | |  | |
|  | **NRPS (=1 if Propensity >= Mean + 1 SD)** | | | | | | | | | | | | | | | | | | | | | | | |
| PrNRPS *Above60d | 0.058**  (0.028) | | -0.034 (0.039) | | -0.038 (0.023) | | -0.127*** (0.034) | | -0.238** (0.094) | | -0.041* (0.024) | | -0.018 (0.028) | | 0.016 (0.018) | | -0.061 (0.073) | | 0.103** (0.041) | | 0.057* (0.030) | | 0.237*** (0.091) | |
| Baseline Mean | 0.252 | | 0.543 | | 0.172 | | 0.427 | | 0.000 | | 0.167 | | 0.248 | | 0.079 | | 0.000 | | 0.353 | | 0.328 | | 0.000 | |
| Controls | Yes | | Yes | | Yes | | Yes | | Yes | | Yes | | Yes | | Yes | | Yes | | Yes | | Yes | | Yes | |
| F-Stat (First Stage) | 401.37 | | 412.90 | | 407.44 | | 399.71 | | 404.08 | | 403.87 | | 405.45 | | 405.87 | | 406.67 | | 398.51 | | 398.38 | | 397.53 | |
| R-squared | 0.060 | | 0.133 | | 0.093 | | 0.089 | | 0.157 | | 0.049 | | 0.068 | | 0.056 | | 0.082 | | 0.081 | | 0.047 | | 0.076 | |
| Observations | 20,926 | | 20,270 | | 20,780 | | 20,476 | | 19,962 | | 19,181 | | 19,263 | | 19,223 | | 19,003 | | 19,557 | | 19,559 | | 19,542 | |
| Notes*:* a) Measured in terms of difficulty. Low (or Negative) values denote less difficulty and better mobility/mood/emotion. (b) Positively coded where Higher values denote better vision. (c) Our DDD coefficient (Policy instrument interacted with an indicator for being over 60 years old). The control group becomes individuals under the Age of 60 living in eligible communities that didn’t offer NRPS between 2011 and 2013. (d) Individual participation instrumented with the policy variable. Also note that Long and Short Distance Vision are indicator variables equal to 1 if either is reported as *At Least Good.* Individual level controls: Marital Status (=1 if Married), Gender (=1 if Female), Education Levels (Base Group is illiterate with no formal education), # of Household Residents. *p< 0.10, **p< 0.05, ***p< 0.01. | | | | | | | | | | | | | | | | | | | | | | | | | |

# **Table B.2:** ITT and LATE Estimates on Indirect Measures of Health using Propensity Score for NRPS Participation.

|  | | **Self-Care** | | | | | | | | **Usual Activities** | | | | | | | | | | **Social Interaction** | | | | | | | | | | | | | | | | | | | | | | |
| --- | --- | --- | --- | --- | --- | --- | --- | --- | --- | --- | --- | --- | --- | --- | --- | --- | --- | --- | --- | --- | --- | --- | --- | --- | --- | --- | --- | --- | --- | --- | --- | --- | --- | --- | --- | --- | --- | --- | --- | --- | --- | --- |
|  | | **Diff Getting Dressed (Yes=1)** | **Diff Taking Bath (Yes=1)** | | **Diff Eating (Yes=1)** | | **Self-Care Index a** | | | **Diff Preparing Hot Meals (Yes=1)** | | | | | **Diff Grocery Shopping (Yes=1)** | **Diff Cleaning House (Yes=1)** | **Usual Activities Index a** | | | **Contact with Parents or In-Laws (Yes=1)** | | **Contact with Child over Phone/Email (Yes=1)** | | | | | **Contact with Child in Person/Phone/ Email (Yes=1)** | | | | | | | **Social Interaction Index b** | | | | | | | | |
|  | | (1) | (2) | | (3) | | (4) | | | (5) | | | | | (6) | (7) | (8) | | | (9) | | (10) | | | | | (11) | | | | | | | (12) | | | | | | | |
| Panel A (ITT): | |  |  | |  | |  | | |  | | | | |  |  |  | | |  | |  | | | | |  | | | | | | |  | | | | | | | |
|  | | **NRPS (=1 if Propensity >= Mean + .5 SD)** | | | | | | | | | | | | | | | | | | | | | | | | | | | | | | | | | | | | | | | |
| Offered NRPS * Above60c | | -0.017** (0.008) | -0.026** (0.010) | | -0.024*** (0.007) | | -0.182*** (0.057) | | | -0.020* (0.011) | | | | | -0.016 (0.011) | -0.016 (0.011) | -0.105* (0.055) | | | 0.029* (0.015) | | -0.031  (0.024) | | | | | 0.009  (0.009) | | | | | | | 0.032 (0.051) | | | | | | | |
| Baseline Mean | | 0.056 | 0.071 | | 0.029 | | 0.000 | | | 0.096 | | | | | 0.098 | 0.106 | 0.000 | | | 0.270 | | 0.523 | | | | | 0.909 | | | | | | | 0.000 | | | | | | | |
| Controls | | Yes | Yes | | Yes | | Yes | | | Yes | | | | | Yes | Yes | Yes | | | Yes | | Yes | | | | | Yes | | | | | | | Yes | | | | | | | |
| R-squared | | 0.033 | 0.070 | | 0.027 | | 0.066 | | | 0.063 | | | | | 0.079 | 0.057 | 0.091 | | | 0.207 | | 0.087 | | | | | 0.100 | | | | | | | 0.087 | | | | | | | |
| Observations | | 19,183 | 19,156 | | 19,184 | | 19,155 | | | 19,298 | | | | | 19,301 | 19,328 | 19,235 | | | 18,510 | | 14,267 | | | | | 18,779 | | | | | | | 13,712 | | | | | | | |
|  | |  |  | |  | |  | | |  | | | | |  |  |  | | |  | |  | | | | |  | | | | | | |  | | | | | | | |
|  | | **NRPS (=1 if Propensity >= Mean + 1 SD)** | | | | | | | | | | | | | | | | | | | | | | | | | | | | | | | | | | | | | | | |
| Offered NRPS * Above60c | | -0.018**  (0.008) | -0.025*** (0.009) | | -0.022*** (0.006) | | -0.175*** (0.053) | | | -0.019* (0.011) | | | | | -0.022** (0.010) | -0.017* (0.010) | -0.116** (0.050) | | | 0.035** (0.014) | | -0.039* (0.023) | | | | | 0.006  (0.009) | | | | | | | 0.012 (0.050) | | | | | | | |
| Baseline Mean | | 0.056 | 0.071 | | 0.029 | | 0.000 | | | 0.096 | | | | | 0.098 | 0.106 | 0.000 | | | 0.270 | | 0.523 | | | | | 0.909 | | | | | | | 0.000 | | | | | | | |
| Controls | | Yes | Yes | | Yes | | Yes | | | Yes | | | | | Yes | Yes | Yes | | | Yes | | Yes | | | | | Yes | | | | | | | Yes | | | | | | | |
| R-squared | | 0.033 | 0.068 | | 0.024 | | 0.064 | | | 0.064 | | | | | 0.078 | 0.058 | 0.091 | | | 0.211 | | 0.089 | | | | | 0.103 | | | | | | | 0.090 | | | | | | | |
| Observations | | 20,715 | 20,687 | | 20,716 | | 20,686 | | | 20,843 | | | | | 20,846 | 20,874 | 20,775 | | | 20,041 | | 15,436 | | | | | 20,301 | | | | | | | 14,867 | | | | | | | |
|  | |  |  | |  | |  | | |  | | | | |  |  |  | | |  | |  | | | | |  | | | | | | |  | | | | | | | |
| Panel B (TOT): | |  |  | |  | |  | | |  | | | | |  |  |  | | |  | |  | | | | |  | | | | | | |  | | | | | | | |
|  | | **NRPS (=1 if Propensity >= Mean + .5 SD)** | | | | | | | | | | | | | | | | | | | | | | | | | | | | | | | | | | | | | | | |
| PrNRPS * Above60d | | -0.035** (0.017) | | -0.053** (0.021) | | -0.049*** (0.013) | | -0.372*** (0.117) | | | | -0.040* (0.023) | | | -0.033 (0.022) | -0.033 (0.022) | | -0.215* (0.112) | | 0.058* (0.030) | | | | -0.063 (0.048) | | | | | 0.018  (0.019) | | | | | | | 0.063 (0.100) | | | |
| Baseline Mean | | 0.056 | | 0.071 | | 0.029 | | 0.000 | | | 0.096 | | | | 0.098 | 0.106 | | 0.000 | | 0.270 | | | 0.523 | | | | | 0.909 | | | | | | | 0.000 | | | | | |
| Controls | | Yes | | Yes | | Yes | | Yes | | | Yes | | | | Yes | Yes | | Yes | | Yes | | | Yes | | | | | Yes | | | | | | | Yes | | | | | |
| F-Stat (First Stage) | | 576.95 | | 574.32 | | 577.20 | | 574.08 | | | 569.10 | | | | 570.61 | 573.68 | | 569.23 | | 616.69 | | | 570.87 | | | | | 556.30 | | | | | | | 624.23 | | | | | |
| R-squared | | 0.032 | | 0.066 | | 0.018 | | 0.060 | | | 0.061 | | | | 0.078 | 0.056 | | 0.088 | | 0.205 | | | 0.085 | | | | | 0.101 | | | | | | | 0.087 | | | | | |
| Observations | | 19,183 | | 19,156 | | 19,184 | | 19,155 | | | 19,298 | | | | 19,301 | 19,328 | | 19,235 | | 18,510 | | | 14,267 | | | | | 18,779 | | | | | | | 13,712 | | | | | |
|  | |  |  | |  | |  | | |  | | | | |  |  |  | | |  | |  | | | | |  | | | | | | |  | | | | | | | |
|  | **NRPS (=1 if Propensity >= Mean + 1 SD)** | | | | | | | | | | | | | | | | | | | | | | | | | | | | | | | | | | | |
| PrNRPS * Above60d | | -0.038**  (0.016) | | -0.051*** (0.019) | | -0.045*** (0.013) | | | -0.362***  (0.110) | | | | | -0.040* (0.022) | -0.045** (0.020) | -0.035* (0.021) | | | -0.239** (0.104) | | 0.072** (0.047) | | | | | -0.079* (0.047) | | | | | 0.012 (0.019) | | 0.025 (0.099) | | | | |
| Baseline Mean | | 0.056 | | 0.071 | | 0.029 | | 0.000 | | | | | 0.096 | | 0.098 | 0.106 | | 0.000 | | 0.270 | | | | | 0.523 | | | | | 0.909 | | 0.000 | | | | | | |
| Controls | | Yes | | Yes | | Yes | | Yes | | | | | Yes | | Yes | Yes | | Yes | | Yes | | | | | Yes | | | | | Yes | | Yes | | | | | | |
| F-Stat (First Stage) | | 407.55 | | 405.64 | | 407.64 | | 405.55 | | | | | 404.18 | | 401.51 | 403.81 | | 403.97 | | 417.00 | | | | | 395.38 | | | | | 396.18 | | 411.41 | | | | | | |
| R-squared | | 0.031 | | 0.064 | | 0.017 | | 0.058 | | | | | 0.062 | | 0.075 | 0.056 | | 0.088 | | 0.208 | | | | | 0.086 | | | | | 0.103 | | 0.090 | | | | | | |
| Observations | | 20,715 | | 20,687 | | 20,716 | | 20,686 | | | | | 20,843 | | 20,846 | 20,874 | | 20,775 | | 20,041 | | | | | 15,436 | | | | | 20,301 | | 14,867 | | | | | | |
| Notes*:* (a) Measured in terms of difficulty. Low (or Negative) values denote less difficulty and better mood/emotion. (b) Positively coded where Higher values denote more social interaction. (c) Our DDD coefficient (Policy instrument interacted with an indicator for being over 60 years old). The control group becomes individuals under the Age of 60 living in eligible communities that didn’t offer NRPS between 2011 and 2013. (d) Individual participation instrumented with the policy variable. Individual level controls: Marital Status (=1 if Married), Gender (=1 if Female), Education Levels (Base Group is illiterate with no formal education), # of Household Residents. *p< 0.10, **p< 0.05, ***p< 0.01. | | | | | | | | | | | | | | | | | | | | | | | | | | | | | | | | | | | | | | | | | | | |

# **Table B.3**: ITT and LATE Estimates on Health Mechanisms, Healthcare Utilization and Disease States using Propensity Score for NRPS Participation.

|  | **Health Behavior** | | | | | | | **Health Utilization** | | | | | **Disease States** | | | | |
| --- | --- | --- | --- | --- | --- | --- | --- | --- | --- | --- | --- | --- | --- | --- | --- | --- | --- |
|  | **Currently Smoking (Yes=1)** | **Number of Cigarettes per Day** | **Drink Alcohol in Past Year (Yes=1)** | **Drink Regularly in Past Year (Yes=1)** | **Drink Frequency in Past Year** | **Underweight (Yes=1)** | **Sleep Duration (Hours)** | | **Hospital Visit Last Year (Yes=1)** | **Doctor Visit Last Month (Yes=1)** | **Hospital Out-of-Pocket (Yuan)** | **Doctor Out-of-Pocket (Yuan)** | | **Diagnosed w/ Diabetes Past Year (Yes=1)** | **Diagnosed w/ Hypertension Past Year (Yes=1)** | |
|  | (1) | (2) | (3) | (4) | (5) | (6) | (7) | | (8) | (9) | (10) | (11) | | (12) | (13) | |
| Panel A (ITT): |  |  |  |  |  |  |  | |  |  |  |  | |  |  | |
|  | **NRPS (=1 if Propensity >= Mean + .5 SD)** | | | | | | | | | | | | | | |
| Offered NRPS * Above60c | 0.033** (0.014) | 1.073** (0.513) | 0.009 (0.023) | -0.005 (0.010) | -0.024 (0.064) | -0.010 (0.009) | 0.082 (0.074) | | 0.012 (0.013) | -0.018 (0.015) | 120.896 (184.171) | 76.251 (48.201) | | 0.006* (0.004) | -0.004 (0.006) | |
| Baseline Mean | 0.254 | 5.129 | 0.330 | 0.186 | 1.148 | 0.070 | 6.281 | | 0.111 | 0.202 | 602.685 | 95.954 | | 0.019 | 0.055 | |
| Controls | Yes | Yes | Yes | Yes | Yes | Yes | Yes | | Yes | Yes | Yes | Yes | | Yes | Yes | |
| R-squared | 0.121 | 0.124 | 0.109 | 0.095 | 0.105 | 0.041 | 0.046 | | 0.008 | 0.023 | -0.019 | -0.029 | | 0.000 | -0.005 | |
| Observations | 16,629 | 15,257 | 19,345 | 18,539 | 18,539 | 14,776 | 17,842 | | 19,318 | 19,040 | 19,155 | 19,002 | | 16,016 | 16,116 | |
|  |  |  |  |  |  |  |  | |  |  |  |  | |  |  | |
|  | **NRPS (=1 if Propensity >= Mean + 1 SD)** | | | | | | | | | | | | | | |
| Offered NRPS * Above60c | 0.018  (0.013) | 0.984** (0.433) | 0.001 (0.020) | -0.008 (0.009) | -0.037 (0.057) | -0.002 (0.009) | 0.111 (0.070) | | 0.019 (0.012) | -0.015 (0.014) | 134.930 (171.712) | 73.981 (47.121) | | 0.000 (0.003) | 0.001 (0.005) | |
| Baseline Mean | 0.254 | 5.129 | 0.330 | 0.186 | 1.148 | 0.070 | 6.281 | | 0.111 | 0.202 | 602.685 | 95.954 | | 0.019 | 0.055 | |
| Controls | Yes | Yes | Yes | Yes | Yes | Yes | Yes | | Yes | Yes | Yes | Yes | | Yes | Yes | |
| R-squared | 0.098 | 0.099 | 0.095 | 0.086 | 0.094 | 0.043 | 0.048 | | 0.012 | 0.027 | -0.019 | -0.024 | | -0.002 | -0.004 | |
| Observations | 18,077 | 16,613 | 20,893 | 20,012 | 20,012 | 16,056 | 19,295 | | 20,862 | 20,568 | 20,685 | 20,534 | | 17,485 | 17,603 | |
| Panel B (TOT): |  |  |  |  |  |  |  | |  |  |  |  | |  |  | |
|  | **NRPS (=1 if Propensity >= Mean + .5 SD)** | | | | | | | | | | | | | | |
| PrNRPS * Above60 d | 0.066** (0.029) | 2.160** (1.007) | 0.019 (0.045) | -0.011 (0.021) | -0.051 (0.133) | -0.021 (0.019) | 0.170 (0.153) | | 0.023 (0.027) | -0.036 (0.030) | 245.845 (375.619) | 155.756 (98.776) | | 0.013* (0.008) | -0.007 (0.012) | |
| Baseline Mean | 0.254 | 5.129 | 0.330 | 0.186 | 1.148 | 0.070 | 6.281 | | 0.111 | 0.202 | 602.685 | 95.954 | | 0.019 | 0.055 | |
| Controls | Yes | Yes | Yes | Yes | Yes | Yes | Yes | | Yes | Yes | Yes | Yes | | Yes | Yes | |
| F-Stat (First Stage) | 532.77 | 542.48 | 574.11 | 577.66 | 577.66 | 534.04 | 556.91 | | 571.90 | 576.67 | 574.23 | 568.80 | | 581.98 | 588.80 | |
| R-squared | 0.119 | 0.123 | 0.108 | 0.095 | 0.105 | 0.040 | 0.045 | | 0.007 | 0.023 | -0.019 | -0.030 | | -0.001 | -0.005 | |
| Observations | 16,629 | 15,257 | 19,345 | 18,539 | 18,539 | 14,776 | 17,842 | | 19,318 | 19,040 | 19,155 | 19,002 | | 16,016 | 16,116 | |
|  |  |  |  |  |  |  |  | |  |  |  |  | |  |  | |
|  | **NRPS (=1 if Propensity >= Mean + 1 SD)** | | | | | | | | | | | | | | |
| PrNRPS * Above60 d | 0.035  (0.027) | 1.974** (0.869) | 0.003 (0.040) | -0.016 (0.019) | -0.079 (0.120) | -0.004 (0.018) | 0.231  (0.145) | | 0.038 (0.024) | -0.030 (0.028) | 277.685 (354.519) | 153.237  (97.815) | | 0.001 (0.007) | 0.002 (0.011) | |
| Baseline Mean | 0.254 | 5.129 | 0.330 | 0.186 | 1.148 | 0.070 | 6.281 | | 0.111 | 0.202 | 602.685 | 95.954 | | 0.019 | 0.055 | |
| Controls | Yes | Yes | Yes | Yes | Yes | Yes | Yes | | Yes | Yes | Yes | Yes | | Yes | Yes | |
| F-Stat (First Stage) | 381.79 | 391.69 | 404.52 | 405.60 | 405.60 | 378.57 | 394.63 | | 402.54 | 402.33 | 407.04 | 400.19 | | 395.24 | 398.43 | |
| R-squared | 0.097 | 0.098 | 0.095 | 0.086 | 0.094 | 0.043 | 0.047 | | 0.011 | 0.026 | -0.020 | -0.025 | | -0.002 | -0.004 | |
| Observations | 18,077 | 16,613 | 20,893 | 20,012 | 20,012 | 16,056 | 19,295 | | 20,862 | 20,568 | 20,685 | 20,534 | | 17,485 | 17,603 | |
| Notes*:* (a) Our DDD coefficient (Policy instrument interacted with an indicator for being over 60 years old). The control group becomes individuals under the Age of 60 living in eligible communities that didn’t offer NRPS between 2011 and 2013. (b) Individual participation instrumented with the policy variable. Individual level controls: Marital Status (=1 if Married), Gender (=1 if Female), Education Levels (Base Group is illiterate with no formal education), # of Household Residents. *p< 0.10, **p< 0.05, ***p< 0.01. | | | | | | | | | | | | | | | | | |

# **Table B.4:** ITT and LATE Estimates on Direct Measures of Health Omitting Mismeasured Communities.

|  | **Self-Reported Overall** | | **Mobility** | | | | | | | | **Affect** | | | | | | | | **Vision** | | | | | | |
| --- | --- | --- | --- | --- | --- | --- | --- | --- | --- | --- | --- | --- | --- | --- | --- | --- | --- | --- | --- | --- | --- | --- | --- | --- | --- |
|  | ***At Least Good* Health Status (Yes=1)** | | **Diff Jog 1km (Yes=1)** | | **Diff Walk 100m (Yes=1)** | | **Diff Climb Flight of Stairs (Yes=1)** | | **Mobility Index** | | **Everything Mostly an Effort (Yes=1)** | | **Rarely Happy (Yes=1)** | | **Mostly Lonely (Yes=1)** | | **Affect Index a** | | **Long Distance Vision** | | **Short Distance Vision** | | **Vision Index b** | | |
|  | (1) | | (2) | | (3) | | (4) | | (5) | | (6) | | (7) | | (8) | | (9) | | (10) | | (11) | | (12) | | |
| Panel A (ITT): |  | |  | |  | |  | |  | |  | |  | |  | |  | |  | |  | |  | | |
|  | **Sample excluding communities with less than 4 participants** | | | | | | | | | | | | | | | | | | | | | | | | |
| Offered NRPS * Above60c | 0.025* (0.013) | | -0.020 (0.016) | | -0.011 (0.011) | | -0.057*** (0.017) | | -0.105** (0.043) | | -0.027** (0.012) | | -0.012 (0.014) | | 0.005 (0.009) | | -0.054 (0.036) | | 0.047*** (0.017) | | 0.032** (0.014) | | 0.118*** (0.038) | | |
| Baseline Mean | 0.252 | | 0.543 | | 0.172 | | 0.427 | | 0.000 | | 0.167 | | 0.248 | | 0.079 | | 0.000 | | 0.353 | | 0.328 | | 0.000 | | |
| Controls | Yes | | Yes | | Yes | | Yes | | Yes | | Yes | | Yes | | Yes | | Yes | | Yes | | Yes | | Yes | | |
| R-squared | 0.060 | | 0.154 | | 0.100 | | 0.110 | | 0.181 | | 0.051 | | 0.063 | | 0.054 | | 0.079 | | 0.086 | | 0.053 | | 0.084 | | |
| Observations | 20,249 | | 19,601 | | 20,100 | | 19,777 | | 19,271 | | 18,603 | | 18,684 | | 18,643 | | 18,421 | | 18,988 | | 18,990 | | 18,972 | | |
|  |  | |  | |  | |  | |  | |  | |  | |  | |  | |  | |  | |  | | |
|  | **Sample excluding communities with less than 7 participants** | | | | | | | | | | | | | | | | | | | | | | | | |
| Offered NRPS * Above60c | 0.025*  (0.014) | | -0.016  (0.016) | | -0.011 (0.011) | | -0.056***  (0.017) | | -0.100** (0.044) | | -0.027** (0.013) | | -0.013 (0.014) | | 0.005 (0.009) | | -0.055 (0.036) | | 0.046*** (0.017) | | 0.030** (0.014) | | 0.113*** (0.038) | | |
| Baseline Mean | 0.252 | | 0.543 | | 0.172 | | 0.427 | | 0.000 | | 0.167 | | 0.248 | | 0.079 | | 0.000 | | 0.353 | | 0.328 | | 0.000 | | |
| Controls | Yes | | Yes | | Yes | | Yes | | Yes | | Yes | | Yes | | Yes | | Yes | | Yes | | Yes | | Yes | | |
| R-squared | 0.060 | | 0.148 | | 0.096 | | 0.110 | | 0.176 | | 0.051 | | 0.062 | | 0.052 | | 0.078 | | 0.086 | | 0.056 | | 0.085 | | |
| Observations | 19,721 | | 19,085 | | 19,576 | | 19,259 | | 18,761 | | 18,139 | | 18,222 | | 18,182 | | 17,963 | | 18,514 | | 18,516 | | 18,498 | | |
|  |  | |  | |  | |  | |  | |  | |  | |  | |  | |  | |  | |  | | |
| Panel B (TOT): |  | |  | |  | |  | |  | |  | |  | |  | |  | |  | |  | |  | | |
|  | **Sample excluding communities with less than 4 participants** | | | | | | | | | | | | | | | | | | | | | | | | |
| NRPS Participation * Above60d | | 0.059* (0.031) | | -0.047 (0.037) | | -0.025 (0.026) | | -0.133*** (0.040) | | -0.245** (0.101) | | -0.063** (0.029) | | -0.029 (0.032) | | 0.011 (0.021) | | -0.126 (0.083) | | 0.112*** (0.041) | | 0.076** (0.033) | | 0.278*** (0.089) | | | | |
| Baseline Mean | 0.252 | | 0.543 | | 0.172 | | 0.427 | | 0.000 | | 0.167 | | 0.248 | | 0.079 | | 0.000 | | 0.353 | | 0.328 | | 0.000 | | |
| Controls | Yes | | Yes | | Yes | | Yes | | Yes | | Yes | | Yes | | Yes | | Yes | | Yes | | Yes | | Yes | | |
| F-Stat (First Stage) | 248.23 | | 253.04 | | 252.07 | | 252.60 | | 252.19 | | 251.13 | | 253.16 | | 253.52 | | 253.63 | | 248.45 | | 248.58 | | 248.22 | | |
| R-squared | 0.059 | | 0.153 | | 0.099 | | 0.104 | | 0.177 | | 0.049 | | 0.063 | | 0.054 | | 0.078 | | 0.081 | | 0.051 | | 0.079 | | |
| Observations | 20,249 | | 19,601 | | 20,100 | | 19,777 | | 19,271 | | 18,603 | | 18,684 | | 18,643 | | 18,421 | | 18,988 | | 18,990 | | 18,972 | | |
|  |  | |  | |  | |  | |  | |  | |  | |  | |  | |  | |  | |  | | |
|  | **Sample excluding communities with less than 7 participants** | | | | | | | | | | | | | | | | | | | | | | | | |
| NRPS Participation * Above60d | | 0.057*  (0.031) | | -0.035 (0.038) | | -0.025 (0.026) | | -0.129*** (0.040) | | -0.227** (0.101) | | -0.062** (0.030) | | -0.029 (0.032) | | 0.010 (0.021) | | -0.127 (0.083) | | 0.107*** (0.040) | | 0.068** (0.033) | | | 0.260*** (0.088) | | |
| Baseline Mean | 0.252 | | 0.543 | | 0.172 | | 0.427 | | 0.000 | | 0.167 | | 0.248 | | 0.079 | | 0.000 | | 0.353 | | 0.328 | | 0.000 | | |
| Controls | Yes | | Yes | | Yes | | Yes | | Yes | | Yes | | Yes | | Yes | | Yes | | Yes | | Yes | | Yes | | |
| F-Stat (First Stage) | 266.70 | | 273.21 | | 270.39 | | 271.66 | | 273.05 | | 267.42 | | 268.96 | | 269.25 | | 270.63 | | 262.90 | | 263.03 | | 262.65 | | |
| R-squared | 0.059 | | 0.148 | | 0.095 | | 0.103 | | 0.173 | | 0.048 | | 0.062 | | 0.052 | | 0.077 | | 0.082 | | 0.054 | | 0.081 | | |
| Observations | 19,721 | | 19,085 | | 19,576 | | 19,259 | | 18,761 | | 18,139 | | 18,222 | | 18,182 | | 17,963 | | 18,514 | | 18,516 | | 18,498 | | |
| Notes*:* a) Measured in terms of difficulty. Low (or Negative) values denote less difficulty and better mobility/mood/emotion. (b) Positively coded where Higher values denote better vision. (c) Our DDD coefficient (Policy instrument interacted with an indicator for being over 60 years old). The control group becomes individuals under the Age of 60 living in eligible communities that didn’t offer NRPS between 2011 and 2013. (d) Individual participation instrumented with the policy variable. Also note that Long and Short Distance Vision are indicator variables equal to 1 if either is reported as *At Least Good.* Individual level controls: Marital Status (=1 if Married), Gender (=1 if Female), Education Levels (Base Group is illiterate with no formal education), # of Household Residents. *p< 0.10, **p< 0.05, ***p< 0.01. | | | | | | | | | | | | | | | | | | | | | | | | | | |

# **Table B.5:** ITT and LATE Estimates on Indirect Measures of Health Omitting Mismeasured Communities.

|  | **Self-Care** | | | | | | | | | **Usual Activities** | | | | | | | | | | **Social Interaction** | | | | | | | | | | | | | | | | | | |
| --- | --- | --- | --- | --- | --- | --- | --- | --- | --- | --- | --- | --- | --- | --- | --- | --- | --- | --- | --- | --- | --- | --- | --- | --- | --- | --- | --- | --- | --- | --- | --- | --- | --- | --- | --- | --- | --- | --- |
|  | **Diff Getting Dressed (Yes=1)** | | **Diff Taking Bath (Yes=1)** | | **Diff Eating (Yes=1)** | | **Self-Care Index a** | | | **Diff Preparing Hot Meals (Yes=1)** | | | | **Diff Grocery Shopping (Yes=1)** | | **Diff Cleaning House (Yes=1)** | | **Usual Activities Index a** | | **Contact with Parents or In-Laws (Yes=1)** | | **Contact with Child over Phone/Email (Yes=1)** | | | | **Contact with Child in Person/Phone/ Email (Yes=1)** | | | | | | **Social Interaction Index b** | | | |
|  | (1) | | (2) | | (3) | | (4) | | | (5) | | | | (6) | | (7) | | (8) | | (9) | | (10) | | | | (11) | | | | | | (12) | | | |
| Panel A (ITT): |  | |  | |  | |  | | |  | | | |  | |  | |  | |  | |  | | | |  | | | | | |  | | | |
|  | **Sample excluding communities with less than 4 participants** | | | | | | | | | | | | | | | | | | | | | | | | | | | | | | | | | | |
| Offered NRPS * Above60c | -0.014 (0.009) | | -0.017* (0.010) | | -0.018*** (0.006) | | -0.134** (0.057) | | | -0.018 (0.011) | | | | -0.022** (0.010) | | -0.012 (0.011) | | -0.105* (0.054) | | 0.048*** (0.013) | | -0.045** (0.023) | | | | -0.001  (0.010) | | | | | | -0.014 (0.052) | | | |
| Baseline Mean | 0.056 | | 0.071 | | 0.029 | | 0.000 | | | 0.096 | | | | 0.098 | | 0.106 | | 0.000 | | 0.270 | | 0.523 | | | | 0.909 | | | | | | 0.000 | | | |
| Controls | Yes | | Yes | | Yes | | Yes | | | Yes | | | | Yes | | Yes | | Yes | | Yes | | Yes | | | | Yes | | | | | | Yes | | | |
| R-squared | 0.032 | | 0.067 | | 0.026 | | 0.064 | | | 0.067 | | | | 0.082 | | 0.060 | | 0.093 | | 0.210 | | 0.084 | | | | 0.101 | | | | | | 0.085 | | | |
| Observations | 20,055 | | 20,024 | | 20,056 | | 20,023 | | | 20,163 | | | | 20,155 | | 20,191 | | 20,084 | | 19,378 | | 15,009 | | | | 19,670 | | | | | | 14,448 | | | |
|  |  | |  | |  | |  | | |  | | | |  | |  | |  | |  | |  | | | |  | | | | | |  | | | |
|  | **Sample excluding communities with less than 7 participants** | | | | | | | | | | | | | | | | | | | | | | | | | | | | | | | | | | |
| Offered NRPS * Above60c | -0.012 (0.008) | | -0.016* (0.009) | | -0.016** (0.006) | | -0.118** (0.055) | | | -0.017 (0.011) | | | | -0.021** (0.010) | | -0.009 (0.011) | | -0.095* (0.054) | | 0.050*** (0.013) | | -0.042* (0.023) | | | | 0.002  (0.010) | | | | | | -0.002 (0.053) | | | |
| Baseline Mean | 0.056 | | 0.071 | | 0.029 | | 0.000 | | | 0.096 | | | | 0.098 | | 0.106 | | 0.000 | | 0.270 | | 0.523 | | | | 0.909 | | | | | | 0.000 | | | |
| Controls | Yes | | Yes | | Yes | | Yes | | | Yes | | | | Yes | | Yes | | Yes | | Yes | | Yes | | | | Yes | | | | | | Yes | | | |
| R-squared | 0.031 | | 0.063 | | 0.025 | | 0.061 | | | 0.065 | | | | 0.079 | | 0.059 | | 0.091 | | 0.211 | | 0.081 | | | | 0.102 | | | | | | 0.085 | | | |
| Observations | 19,532 | | 19,501 | | 19,533 | | 19,500 | | | 19,639 | | | | 19,629 | | 19,666 | | 19,560 | | 18,872 | | 14,695 | | | | 19,161 | | | | | | 14,145 | | | |
|  |  | |  | |  | |  | | |  | | | |  | |  | |  | |  | |  | | | |  | | | | | |  | | | |
| Panel B (TOT): |  | |  | |  | |  | | |  | | | |  | |  | |  | |  | |  | | | |  | | | | | |  | | | |
|  | **Sample excluding communities with less than 4 participants** | | | | | | | | | | | | | | | | | | | | | | | | | | | | | | | | | | |
| NRPS Participation * Above60 d | | -0.032  (0.020) | | -0.041* (0.023) | | -0.043*** (0.015) | | | -0.315** (0.134) | | | -0.042 (0.027) | | | -0.052** (0.024) | | -0.027 (0.026) | | -0.245* (0.128) | | 0.111*** (0.031) | | | -0.104** (0.053) | | | | -0.003 (0.023) | | -0.031  (0.119) | | | | | | |
| Baseline Mean | | 0.056 | | 0.071 | | 0.029 | | | 0.000 | | 0.096 | | | | 0.098 | | 0.106 | | 0.000 | | 0.270 | | 0.523 | | | | 0.909 | | | 0.000 | | | | | | | |
| Controls | | Yes | | Yes | | Yes | | | Yes | | Yes | | | | Yes | | Yes | | Yes | | Yes | | Yes | | | | Yes | | | Yes | | | | | | | |
| F-Stat (First Stage) | | 252.98 | | 251.45 | | 253.00 | | | 251.44 | | 251.11 | | | | 249.95 | | 250.08 | | 251.55 | | 256.83 | | 242.72 | | | | 246.03 | | | 246.66 | | | | | | | |
| R-squared | | 0.031 | | 0.065 | | 0.020 | | | 0.060 | | 0.065 | | | | 0.078 | | 0.059 | | 0.090 | | 0.204 | | 0.080 | | | | 0.101 | | | 0.085 | | | | | | | |
| Observations | | 20,055 | | 20,024 | | 20,056 | | | 20,023 | | 20,163 | | | | 20,155 | | 20,191 | | 20,084 | | 19,378 | | 15,009 | | | | 19,670 | | | 14,448 | | | | | | | |
|  |  | |  | |  | |  | | |  | | | |  | |  | |  | |  | |  | | | |  | | | | | |  | | | |
|  | **Sample excluding communities with less than 7 participants** | | | | | | | | | | | | | | | | | | | | | | | | | | | | | | | | | | |
| NRPS Participation * Above60 d | | -0.028  (0.019) | | -0.036*  (0.021) | | -0.037** (0.015) | | -0.271** (0.127) | | | | | -0.038 (0.026) | | -0.049** (0.024) | | -0.021 (0.025) | | -0.219* (0.124) | | 0.114*** (0.031) | | | | -0.095* (0.053) | | | | 0.005 (0.023) | | | | -0.005 (0.119) |
| Baseline Mean | | 0.056 | | 0.071 | | 0.029 | | 0.000 | | | | | 0.096 | | 0.098 | | 0.106 | | 0.000 | | 0.270 | | | | 0.523 | | | 0.909 | | | 0.000 | | | |
| Controls | | Yes | | Yes | | Yes | | Yes | | | | | Yes | | Yes | | Yes | | Yes | | Yes | | | | Yes | | | Yes | | | Yes | | | |
| F-Stat (First Stage) | | 271.24 | | 269.65 | | 271.25 | | 269.64 | | | | | 268.95 | | 268.63 | | 268.14 | | 270.30 | | 277.11 | | | | 250.54 | | | 264.22 | | | 254.22 | | | |
| R-squared | | 0.030 | | 0.062 | | 0.020 | | 0.058 | | | | | 0.063 | | 0.076 | | 0.058 | | 0.088 | | 0.204 | | | | 0.078 | | | 0.102 | | | 0.085 | | | |
| Observations | | 19,532 | | 19,501 | | 19,533 | | 19,500 | | | | | 19,639 | | 19,629 | | 19,666 | | 19,560 | | 18,872 | | | | 14,695 | | | 19,161 | | | 14,145 | | | |
| Notes*:* (a) Measured in terms of difficulty. Low (or Negative) values denote less difficulty and better mood/emotion. (b) Positively coded where Higher values denote more social interaction. (c) Our DDD coefficient (Policy instrument interacted with an indicator for being over 60 years old). The control group becomes individuals under the Age of 60 living in eligible communities that didn’t offer NRPS between 2011 and 2013. (d) Individual participation instrumented with the policy variable. Individual level controls: Marital Status (=1 if Married), Gender (=1 if Female), Education Levels (Base Group is illiterate with no formal education), # of Household Residents. *p< 0.10, **p< 0.05, ***p< 0.01. | | | | | | | | | | | | | | | | | | | | | | | | | | | | | | | | | | | | | | | |

# **Table B.6**: ITT and LATE Estimates on Health Mechanisms, Healthcare Utilization and Disease States Omitting Mismeasured Communities.

|  | **Health Behavior** | | | | | | | **Health Utilization** | | | | **Disease States** | |
| --- | --- | --- | --- | --- | --- | --- | --- | --- | --- | --- | --- | --- | --- |
|  | **Currently Smoking (Yes=1)** | **Number of Cigarettes per Day** | **Drink Alcohol in Past Year (Yes=1)** | **Drink Regularly in Past Year (Yes=1)** | **Drink Frequency in Past Year** | **Underweight (Yes=1)** | **Sleep Duration (Hours)** | **Hospital Visit Last Year (Yes=1)** | **Doctor Visit Last Month (Yes=1)** | **Hospital Out-of-Pocket (Yuan)** | **Doctor Out-of-Pocket (Yuan)** | **Diagnosed w/ Diabetes Past Year (Yes=1)** | **Diagnosed w/ Hypertension Past Year (Yes=1)** |
|  | (1) | (2) | (3) | (4) | (5) | (6) | (7) | (8) | (9) | (10) | (11) | (12) | (13) |
| Panel A (ITT): |  |  |  |  |  |  |  |  |  |  |  |  |  |
|  | **Sample excluding communities with less than 4 participants** | | | | | | | | | | | | |
| Offered NRPS * Above60c | 0.002  (0.011) | 0.563*  (0.290) | -0.006 (0.013) | -0.021** (0.010) | -0.096 (0.062) | -0.011 (0.009) | 0.118 (0.083) | 0.014 (0.011) | -0.009 (0.013) | -20.192 (136.911) | 60.920 (43.878) | -0.003 (0.003) | 0.002 (0.006) |
| Baseline Mean | 0.254 | 5.129 | 0.330 | 0.186 | 1.148 | 0.070 | 6.281 | 0.111 | 0.202 | 602.685 | 95.954 | 0.019 | 0.055 |
| Controls | Yes | Yes | Yes | Yes | Yes | Yes | Yes | Yes | Yes | Yes | Yes | Yes | Yes |
| R-squared | 0.347 | 0.342 | 0.261 | 0.213 | 0.234 | 0.047 | 0.049 | 0.015 | 0.032 | -0.018 | -0.023 | -0.006 | -0.006 |
| Observations | 17,444 | 16,172 | 20,215 | 19,461 | 19,461 | 15,613 | 18,686 | 20,185 | 19,921 | 20,012 | 19,865 | 17,078 | 17,208 |
|  |  |  |  |  |  |  |  |  |  |  |  |  |  |
|  | **Sample excluding communities with less than 7 participants** | | | | | | | | | | | | |
| Offered NRPS * Above60c | 0.005 (0.012) | 0.598** (0.300) | -0.004 (0.014) | -0.019* (0.010) | -0.083 (0.064) | -0.010 (0.009) | 0.097 (0.083) | 0.011 (0.011) | -0.007 (0.013) | -37.236 (139.027) | 59.851 (44.855) | -0.004 (0.003) | 0.003 (0.006) |
| Baseline Mean | 0.254 | 5.129 | 0.330 | 0.186 | 1.148 | 0.070 | 6.281 | 0.111 | 0.202 | 602.685 | 95.954 | 0.019 | 0.055 |
| Controls | Yes | Yes | Yes | Yes | Yes | Yes | Yes | Yes | Yes | Yes | Yes | Yes | Yes |
| R-squared | 0.350 | 0.341 | 0.258 | 0.214 | 0.234 | 0.047 | 0.047 | 0.016 | 0.033 | -0.019 | -0.023 | -0.006 | -0.006 |
| Observations | 16,984 | 15,750 | 19,690 | 18,960 | 18,960 | 15,261 | 18,216 | 19,662 | 19,406 | 19,495 | 19,350 | 16,655 | 16,780 |
| Panel B (TOT): |  |  |  |  |  |  |  |  |  |  |  |  |  |
|  | **Sample excluding communities with less than 4 participants** | | | | | | | | | | | | |
| NRPS Participation * Above60 b | 0.005  (0.026) | 1.307*  (0.665) | -0.013 (0.031) | -0.049** (0.025) | -0.228 (0.148) | -0.026 (0.021) | 0.275 (0.196) | 0.033 (0.025) | -0.021 (0.030) | -47.200 (319.945) | 143.552 (103.295) | -0.007 (0.007) | 0.005 (0.013) |
| Baseline Mean | 0.254 | 5.129 | 0.330 | 0.186 | 1.148 | 0.070 | 6.281 | 0.111 | 0.202 | 602.685 | 95.954 | 0.019 | 0.055 |
| Controls | Yes | Yes | Yes | Yes | Yes | Yes | Yes | Yes | Yes | Yes | Yes | Yes | Yes |
| F-Stat (First Stage) | 236.78 | 234.81 | 249.77 | 250.07 | 250.07 | 237.33 | 252.59 | 249.50 | 246.99 | 250.36 | 249.63 | 234.70 | 238.61 |
| R-squared | 0.346 | 0.341 | 0.261 | 0.212 | 0.234 | 0.046 | 0.047 | 0.014 | 0.031 | -0.018 | -0.024 | -0.007 | -0.006 |
| Observations | 17,444 | 16,172 | 20,215 | 19,461 | 19,461 | 15,613 | 18,686 | 20,185 | 19,921 | 20,012 | 19,865 | 17,078 | 17,208 |
|  |  |  |  |  |  |  |  |  |  |  |  |  |  |
|  | **Sample excluding communities with less than 7 participants** | | | | | | | | | | | | |
| NRPS Participation * Above60 b | 0.012 (0.026) | 1.360** (0.672) | -0.010 (0.031) | -0.044* (0.025) | -0.194 (0.149) | -0.022 (0.021) | 0.222 (0.193) | 0.026 (0.025) | -0.017 (0.030) | -85.227 (318.108) | 138.105 (103.357) | -0.009 (0.008) | 0.007 (0.014) |
| Baseline Mean | 0.254 | 5.129 | 0.330 | 0.186 | 1.148 | 0.070 | 6.281 | 0.111 | 0.202 | 602.685 | 95.954 | 0.019 | 0.055 |
| Controls | Yes | Yes | Yes | Yes | Yes | Yes | Yes | Yes | Yes | Yes | Yes | Yes | Yes |
| F-Stat (First Stage) | 250.75 | 248.68 | 267.07 | 266.68 | 266.68 | 247.36 | 268.59 | 266.99 | 265.35 | 268.55 | 265.96 | 255.38 | 260.43 |
| R-squared | 0.350 | 0.340 | 0.258 | 0.213 | 0.233 | 0.046 | 0.046 | 0.015 | 0.033 | -0.019 | -0.023 | -0.007 | -0.006 |
| Observations | 16,984 | 15,750 | 19,690 | 18,960 | 18,960 | 15,261 | 18,216 | 19,662 | 19,406 | 19,495 | 19,350 | 16,655 | 16,780 |
| Notes*:* (a) Our DDD coefficient (Policy instrument interacted with an indicator for being over 60 years old). The control group becomes individuals under the Age of 60 living in eligible communities that didn’t offer NRPS between 2011 and 2013. (b) Individual participation instrumented with the policy variable. Individual level controls: Marital Status (=1 if Married), Gender (=1 if Female), Education Levels (Base Group is illiterate with no formal education), # of Household Residents. *p< 0.10, **p< 0.05, ***p< 0.01. | | | | | | | | | | | | | |

# **Table B.7:** ITT and LATE Estimates on Direct Measures of Health Varying the Definition of Instrument.

|  | **Self-Reported Overall** | | **Mobility** | | | | | | | | **Affect** | | | | | | | | **Vision** | | | | | |
| --- | --- | --- | --- | --- | --- | --- | --- | --- | --- | --- | --- | --- | --- | --- | --- | --- | --- | --- | --- | --- | --- | --- | --- | --- |
|  | ***At Least Good* Health Status (Yes=1)** | | **Diff Jog 1km (Yes=1)** | | **Diff Walk 100m (Yes=1)** | | **Diff Climb Flight of Stairs (Yes=1)** | | **Mobility Index** | | **Everything Mostly an Effort (Yes=1)** | | **Rarely Happy (Yes=1)** | | **Mostly Lonely (Yes=1)** | | **Affect Index a** | | **Long Distance Vision** | | **Short Distance Vision** | | **Vision Index b** | |
|  | (1) | | (2) | | (3) | | (4) | | (5) | | (6) | | (7) | | (8) | | (9) | | (10) | | (11) | | (12) | |
| Panel A (ITT): |  | |  | |  | |  | |  | |  | |  | |  | |  | |  | |  | |  | |
|  | **Offer NRPS (=1 if at least 4 in community participate)** | | | | | | | | | | | | | | | | | | | | | | | |
| Offered NRPS * Above60c | 0.023*  (0.013) | | -0.011  (0.019) | | -0.015  (0.011) | | -0.051***  (0.015) | | -0.093**  (0.042) | | -0.023**  (0.011) | | -0.010 (0.013) | | 0.006 (0.008) | | -0.041 (0.034) | | 0.047** (0.020) | | 0.020 (0.015) | | 0.099** (0.045) | |
| Baseline Mean | 0.252 | | 0.543 | | 0.172 | | 0.427 | | 0.000 | | 0.167 | | 0.248 | | 0.079 | | 0.000 | | 0.353 | | 0.328 | | 0.000 | |
| Controls | Yes | | Yes | | Yes | | Yes | | Yes | | Yes | | Yes | | Yes | | Yes | | Yes | | Yes | | Yes | |
| R-squared | 0.066 | | 0.153 | | 0.103 | | 0.115 | | 0.185 | | 0.052 | | 0.066 | | 0.056 | | 0.081 | | 0.091 | | 0.052 | | 0.085 | |
| Observations | 21,888 | | 21,189 | | 21,730 | | 21,400 | | 20,853 | | 20,047 | | 20,139 | | 20,094 | | 19,851 | | 20,466 | | 20,468 | | 20,450 | |
|  |  | |  | |  | |  | |  | |  | |  | |  | |  | |  | |  | |  | |
|  | **Offer NRPS (=1 if at least 7 in community participate)** | | | | | | | | | | | | | | | | | | | | | | | |
| Offered NRPS * Above60c | 0.020 (0.013) | | -0.007 (0.018) | | -0.015 (0.011) | | -0.048*** (0.015) | | -0.085** (0.041) | | -0.019 (0.011) | | -0.009 (0.013) | | 0.005 (0.009) | | -0.035 (0.034) | | 0.041** (0.020) | | 0.017 (0.015) | | 0.085* (0.044) | |
| Baseline Mean | 0.252 | | 0.543 | | 0.172 | | 0.427 | | 0.000 | | 0.167 | | 0.248 | | 0.079 | | 0.000 | | 0.353 | | 0.328 | | 0.000 | |
| Controls | Yes | | Yes | | Yes | | Yes | | Yes | | Yes | | Yes | | Yes | | Yes | | Yes | | Yes | | Yes | |
| R-squared | 0.066 | | 0.153 | | 0.103 | | 0.115 | | 0.185 | | 0.052 | | 0.066 | | 0.056 | | 0.081 | | 0.091 | | 0.052 | | 0.084 | |
| Observations | 21,888 | | 21,189 | | 21,730 | | 21,400 | | 20,853 | | 20,047 | | 20,139 | | 20,094 | | 19,851 | | 20,466 | | 20,468 | | 20,450 | |
|  |  | |  | |  | |  | |  | |  | |  | |  | |  | |  | |  | |  | |
| Panel B (TOT): |  | |  | |  | |  | |  | |  | |  | |  | |  | |  | |  | |  | |
|  | **Offer NRPS (=1 if at least 4 in community participate)** | | | | | | | | | | | | | | | | | | | | | | | |
| NRPS Participation * Above60d | | 0.052*  (0.030) | | -0.025 (0.041) | | -0.033 (0.024) | | -0.114*** (0.035) | | -0.209** (0.094) | | -0.052** (0.026) | | -0.023 (0.030) | | 0.014 (0.019) | | -0.092 (0.076) | | 0.107** (0.047) | | 0.045 (0.034) | | 0.224** (0.104) | | |
| Baseline Mean | 0.252 | | 0.543 | | 0.172 | | 0.427 | | 0.000 | | 0.167 | | 0.248 | | 0.079 | | 0.000 | | 0.353 | | 0.328 | | 0.000 | |
| Controls | Yes | | Yes | | Yes | | Yes | | Yes | | Yes | | Yes | | Yes | | Yes | | Yes | | Yes | | Yes | |
| F-Stat (First Stage) | 246.51 | | 251.46 | | 249.60 | | 250.64 | | 250.78 | | 249.41 | | 251.40 | | 251.58 | | 251.83 | | 246.63 | | 246.78 | | 246.41 | |
| R-squared | 0.065 | | 0.153 | | 0.102 | | 0.111 | | 0.182 | | 0.050 | | 0.065 | | 0.055 | | 0.081 | | 0.086 | | 0.051 | | 0.081 | |
| Observations | 21,888 | | 21,189 | | 21,730 | | 21,400 | | 20,853 | | 20,047 | | 20,139 | | 20,094 | | 19,851 | | 20,466 | | 20,468 | | 20,450 | |
|  |  | |  | |  | |  | |  | |  | |  | |  | |  | |  | |  | |  | |
|  | **Offer NRPS (=1 if at least 7 in community participate)** | | | | | | | | | | | | | | | | | | | | | | | |
| NRPS Participation * Above60d | 0.045 (0.029) | | -0.016 (0.040) | | -0.034 (0.023) | | -0.105*** (0.034) | | -0.188** (0.091) | | -0.041 (0.026) | | -0.020 (0.030) | | 0.011 (0.019) | | -0.077 (0.075) | | 0.091** (0.046) | | 0.038 (0.033) | | 0.190* (0.101) | |
| Baseline Mean | 0.252 | | 0.543 | | 0.172 | | 0.427 | | 0.000 | | 0.167 | | 0.248 | | 0.079 | | 0.000 | | 0.353 | | 0.328 | | 0.000 | |
| Controls | Yes | | Yes | | Yes | | Yes | | Yes | | Yes | | Yes | | Yes | | Yes | | Yes | | Yes | | Yes | |
| F-Stat (First Stage) | 265.55 | | 271.61 | | 268.29 | | 270.22 | | 271.78 | | 266.57 | | 268.18 | | 268.21 | | 269.49 | | 262.10 | | 262.23 | | 261.85 | |
| R-squared | 0.065 | | 0.153 | | 0.102 | | 0.111 | | 0.183 | | 0.051 | | 0.066 | | 0.056 | | 0.081 | | 0.088 | | 0.051 | | 0.082 | |
| Observations | 21,888 | | 21,189 | | 21,730 | | 21,400 | | 20,853 | | 20,047 | | 20,139 | | 20,094 | | 19,851 | | 20,466 | | 20,468 | | 20,450 | |
| Notes:a) Measured in terms of difficulty. Low (or Negative) values denote less difficulty and better mobility/mood/emotion. (b) Positively coded where Higher values denote better vision. (c) Our DDD coefficient (Policy instrument interacted with an indicator for being over 60 years old). The control group becomes individuals under the Age of 60 living in eligible communities that didn’t offer NRPS between 2011 and 2013. (d) Individual participation instrumented with the policy variable. Also note that Long and Short Distance Vision are indicator variables equal to 1 if either is reported as *At Least Good.* Individual level controls: Marital Status (=1 if Married), Gender (=1 if Female), Education Levels (Base Group is illiterate with no formal education), # of Household Residents. *p< 0.10, **p< 0.05, ***p< 0.01. | | | | | | | | | | | | | | | | | | | | | | | | | |

# **Table B.8:** ITT and LATE Estimates on Indirect Measures of Health Varying the Definition of Instrument.

|  | **Self-Care** | | | | | | | | | **Usual Activities** | | | | | | | | | | | | | | **Social Interaction** | | | | | | | | | | | | | | | | | |
| --- | --- | --- | --- | --- | --- | --- | --- | --- | --- | --- | --- | --- | --- | --- | --- | --- | --- | --- | --- | --- | --- | --- | --- | --- | --- | --- | --- | --- | --- | --- | --- | --- | --- | --- | --- | --- | --- | --- | --- | --- | --- |
|  | **Diff Getting Dressed (Yes=1)** | | **Diff Taking Bath (Yes=1)** | | **Diff Eating (Yes=1)** | | **Self-Care Index a** | | | **Diff Preparing Hot Meals (Yes=1)** | | | | | **Diff Grocery Shopping (Yes=1)** | | | **Diff Cleaning House (Yes=1)** | | | **Usual Activities Index a** | | | **Contact with Parents or In-Laws (Yes=1)** | | | **Contact with Child over Phone/Email (Yes=1)** | | | | | **Contact with Child in Person/Phone/ Email (Yes=1)** | | | | | **Social Interaction Index b** | | | | |
|  | (1) | | (2) | | (3) | | (4) | | | (5) | | | | | (6) | | | (7) | | | (8) | | | (9) | | | (10) | | | | | (11) | | | | | (12) | | | | |
| Panel A (ITT): |  | |  | |  | |  | | |  | | | | |  | | |  | | |  | | |  | | |  | | | | |  | | | | |  | | | | |
|  | **Offer NRPS (=1 if at least 4 in community participate)** | | | | | | | | | | | | | | | | | | | | | | | | | | | | | | | | | | | | | | | | |
| Offered NRPS * Above60c | -0.015** (0.008) | | -0.019** (0.009) | | -0.019*** (0.006) | | -0.143*** (0.050) | | | -0.016 (0.010) | | | | | -0.017* (0.009) | | | -0.012 (0.010) | | | -0.092* (0.048) | | | 0.037*** (0.013) | | | -0.033 (0.025) | | | | | 0.005 (0.009) | | | | | 0.023 (0.052) | | | | |
| Baseline Mean | 0.056 | | 0.071 | | 0.029 | | 0.000 | | | 0.096 | | | | | 0.098 | | | 0.106 | | | 0.000 | | | 0.270 | | | 0.523 | | | | | 0.909 | | | | | 0.000 | | | | |
| Controls | Yes | | Yes | | Yes | | Yes | | | Yes | | | | | Yes | | | Yes | | | Yes | | | Yes | | | Yes | | | | | Yes | | | | | Yes | | | | |
| R-squared | 0.035 | | 0.068 | | 0.026 | | 0.066 | | | 0.066 | | | | | 0.081 | | | 0.061 | | | 0.094 | | | 0.210 | | | 0.087 | | | | | 0.101 | | | | | 0.088 | | | | |
| Observations | 21,669 | | 21,638 | | 21,670 | | 21,637 | | | 21,795 | | | | | 21,790 | | | 21,824 | | | 21,715 | | | 20,971 | | | 16,174 | | | | | 21,246 | | | | | 15,588 | | | | |
|  |  | |  | |  | |  | | |  | | | | |  | | |  | | |  | | |  | | |  | | | | |  | | | | |  | | | | |
|  | **Offer NRPS (=1 if at least 7 in community participate)** | | | | | | | | | | | | | | | | | | | | | | | | | | | | | | | | | | | | | | | | |
| Offered NRPS * Above60c | -0.013* (0.007) | | -0.019** (0.009) | | -0.017*** (0.006) | | -0.132*** (0.049) | | | -0.015 (0.010) | | | | | -0.019** (0.009) | | | -0.010 (0.010) | | | -0.089* (0.048) | | | 0.038*** (0.014) | | | -0.031 (0.025) | | | | | 0.008  (0.009) | | | | | 0.024 (0.053) | | | | |
| Baseline Mean | -0.013* | | -0.019** | | -0.017*** | | -0.132*** | | | -0.015 | | | | | -0.019** | | | -0.010 | | | -0.089* | | | 0.038*** | | | -0.031 | | | | | 0.008 | | | | | 0.024 | | | | |
| Controls | Yes | | Yes | | Yes | | Yes | | | Yes | | | | | Yes | | | Yes | | | Yes | | | Yes | | | Yes | | | | | Yes | | | | | Yes | | | | |
| R-squared | 0.035 | | 0.068 | | 0.025 | | 0.065 | | | 0.066 | | | | | 0.081 | | | 0.061 | | | 0.094 | | | 0.211 | | | 0.087 | | | | | 0.101 | | | | | 0.088 | | | | |
| Observations | 21,669 | | 21,638 | | 21,670 | | 21,637 | | | 21,795 | | | | | 21,790 | | | 21,824 | | | 21,715 | | | 20,971 | | | 16,174 | | | | | 21,246 | | | | | 15,588 | | | | |
|  |  | |  | |  | |  | | |  | | | | |  | | |  | | |  | | |  | | |  | | | | |  | | | | |  | | | | |
| Panel B (TOT): |  | |  | |  | |  | | |  | | | | |  | | |  | | |  | | |  | | |  | | | | |  | | | | |  | | | | |
|  | **Offer NRPS (=1 if at least 4 in community participate)** | | | | | | | | | | | | | | | | | | | | | | | | | | | | | | | | | | | | | | | | |
| NRPS Participation * Above60 d | | -0.035** (0.017) | | -0.042** (0.020) | | -0.043*** (0.013) | | | -0.322*** (0.013) | | | -0.037 (0.024) | | | | | -0.038* (0.021) | | | -0.027 (0.023) | | | -0.207* (0.109) | | | 0.082*** (0.030) | | | -0.072  (0.055) | | | | | 0.011 (0.020) | | | | 0.049 (0.114) | | | |
| Baseline Mean | | 0.056 | | 0.071 | | 0.029 | | | 0.000 | | 0.096 | | | | | | 0.098 | | | 0.106 | | | 0.000 | | | 0.270 | | 0.523 | | | | | 0.909 | | | | | | 0.000 | | | | | |
| Controls | | Yes | | Yes | | Yes | | | Yes | | Yes | | | | | | Yes | | | Yes | | | Yes | | | Yes | | Yes | | | | | Yes | | | | | | Yes | | | | | |
| F-Stat (First Stage) | | 250.97 | | 249.60 | | 250.98 | | | 249.59 | | 249.30 | | | | | | 248.28 | | | 248.29 | | | 249.85 | | | 255.60 | | 241.91 | | | | | 244.60 | | | | | | 245.81 | | | | | |
| R-squared | | 0.034 | | 0.066 | | 0.020 | | | 0.062 | | 0.065 | | | | | | 0.079 | | | 0.060 | | | 0.092 | | | 0.207 | | 0.086 | | | | | 0.101 | | | | | | 0.087 | | | | | |
| Observations | | 21,669 | | 21,638 | | 21,670 | | | 21,637 | | 21,795 | | | | | | 21,790 | | | 21,824 | | | 21,715 | | | 20,971 | | 16,174 | | | | | 21,246 | | | | | | 15,588 | | | | | |
|  |  | |  | |  | |  | | |  | | | | |  | | |  | | |  | | |  | | |  | | | | |  | | | | |  | | | | |
|  | **Offer NRPS (=1 if at least 7 in community participate)** | | | | | | | | | | | | | | | | | | | | | | | | | | | | | | | | | | | | | | | | |
| NRPS Participation * Above60 d | | -0.028* (0.017) | | -0.043** (0.020) | | -0.037*** (0.013) | | -0.292*** (0.110) | | | | | -0.033  (0.023) | | | -0.042**  (0.021) | | | -0.023 (0.022) | | | -0.197* (0.108) | | | 0.084*** (0.030) | | | | | -0.066  (0.054) | | | | | 0.017 (0.020) | | | | | 0.051 (0.113) | | | |
| Baseline Mean | | 0.056 | | 0.071 | | 0.029 | | | 0.000 | | | | | 0.096 | | | 0.098 | | | 0.106 | | | 0.000 | | | 0.270 | | | | | 0.523 | | | | | 0.909 | | | | | 0.000 |
| Controls | | Yes | | Yes | | Yes | | | Yes | | | | | Yes | | | Yes | | | Yes | | | Yes | | | Yes | | | | | Yes | | | | | Yes | | | | | Yes |
| F-Stat (First Stage) | | 269.64 | | 268.21 | | 269.65 | | | 268.20 | | | | | 267.66 | | | 267.48 | | | 266.86 | | | 269.06 | | | 276.58 | | | | | 250.09 | | | | | 263.63 | | | | | 253.88 |
| R-squared | | 0.034 | | 0.066 | | 0.021 | | | 0.062 | | | | | 0.065 | | | 0.079 | | | 0.061 | | | 0.092 | | | 0.207 | | | | | 0.086 | | | | | 0.101 | | | | | 0.087 |
| Observations | | 21,669 | | 21,638 | | 21,670 | | | 21,637 | | | | | 21,795 | | | 21,790 | | | 21,824 | | | 21,715 | | | 20,971 | | | | | 16,174 | | | | | 21,246 | | | | | 15,588 |
| Notes:(a) Measured in terms of difficulty. Low (or Negative) values denote less difficulty and better mood/emotion. (b) Positively coded where Higher values denote more social interaction. (c) Our DDD coefficient (Policy instrument interacted with an indicator for being over 60 years old). The control group becomes individuals under the Age of 60 living in eligible communities that didn’t offer NRPS between 2011 and 2013. (d) Individual participation instrumented with the policy variable. Individual level controls: Marital Status (=1 if Married), Gender (=1 if Female), Education Levels (Base Group is illiterate with no formal education), # of Household Residents. *p< 0.10, **p< 0.05, ***p< 0.01. | | | | | | | | | | | | | | | | | | | | | | | | | | | | | | | | | | | | | | | | | | |

# **Table B.9**: ITT and LATE Estimates on Health Mechanisms, Healthcare Utilization and Disease States Varying the Definition of Instrument.

|  | **Health Behavior** | | | | | | | **Health Utilization** | | | | **Disease States** | |
| --- | --- | --- | --- | --- | --- | --- | --- | --- | --- | --- | --- | --- | --- |
|  | **Currently Smoking (Yes=1)** | **Number of Cigarettes per Day** | **Drink Alcohol in Past Year (Yes=1)** | **Drink Regularly in Past Year (Yes=1)** | **Drink Frequency in Past Year** | **Underweight (Yes=1)** | **Sleep Duration (Hours)** | **Hospital Visit Last Year (Yes=1)** | **Doctor Visit Last Month (Yes=1)** | **Hospital Out-of-Pocket (Yuan)** | **Doctor Out-of-Pocket (Yuan)** | **Diagnosed w/ Diabetes Past Year (Yes=1)** | **Diagnosed w/ Hypertension Past Year (Yes=1)** |
|  | (1) | (2) | (3) | (4) | (5) | (6) | (7) | (8) | (9) | (10) | (11) | (12) | (13) |
| Panel A (ITT): |  |  |  |  |  |  |  |  |  |  |  |  |  |
|  | **Offer NRPS (=1 if at least 4 in community participate)** | | | | | | | | | | | | |
| Offered NRPS * Above60c | 0.004 (0.013) | 0.423 (0.302) | -0.026 (0.016) | -0.024** (0.010) | -0.137**  (0.057) | -0.006 (0.008) | 0.101 (0.073) | 0.018* (0.011) | -0.012 (0.014) | 106.793  (163.824) | 44.908 (46.650) | 0.001 (0.003) | 0.002  (0.005) |
| Baseline Mean | 0.254 | 5.129 | 0.330 | 0.186 | 1.148 | 0.070 | 6.281 | 0.111 | 0.202 | 602.685 | 95.954 | 0.019 | 0.055 |
| Controls | Yes | Yes | Yes | Yes | Yes | Yes | Yes | Yes | Yes | Yes | Yes | Yes | Yes |
| R-squared | 0.344 | 0.336 | 0.263 | 0.217 | 0.238 | 0.044 | 0.051 | 0.014 | 0.033 | -0.018 | -0.021 | 0.001 | -0.004 |
| Observations | 18,975 | 17,494 | 21,850 | 20,951 | 20,951 | 16,792 | 20,155 | 21,814 | 21,508 | 21,628 | 21,474 | 18,365 | 18,492 |
|  |  |  |  |  |  |  |  |  |  |  |  |  |  |
|  | **Offer NRPS (=1 if at least 7 in community participate)** | | | | | | | | | | | | |
| Offered NRPS * Above60c | 0.008  (0.013) | 0.417  (0.300) | -0.022 (0.016) | -0.019** (0.010) | -0.109* (0.056) | -0.005 (0.008) | 0.095 (0.073) | 0.013  (0.011) | -0.012 (0.014) | 35.900 (165.380) | 40.133 (47.500) | -0.001 (0.004) | -0.000  (0.006) |
| Baseline Mean | 0.254 | 5.129 | 0.330 | 0.186 | 1.148 | 0.070 | 6.281 | 0.111 | 0.202 | 602.685 | 95.954 | 0.019 | 0.055 |
| Controls | Yes | Yes | Yes | Yes | Yes | Yes | Yes | Yes | Yes | Yes | Yes | Yes | Yes |
| R-squared | 0.344 | 0.336 | 0.263 | 0.217 | 0.238 | 0.044 | 0.051 | 0.013 | 0.033 | -0.018 | -0.021 | 0.001 | -0.004 |
| Observations | 18,975 | 17,494 | 21,850 | 20,951 | 20,951 | 16,792 | 20,155 | 21,814 | 21,508 | 21,628 | 21,474 | 18,365 | 18,492 |
| Panel B (TOT): |  |  |  |  |  |  |  |  |  |  |  |  |  |
|  | **Offer NRPS (=1 if at least 4 in community participate)** | | | | | | | | | | | | |
| NRPS Participation * Above60 b | 0.008 (0.030) | 0.948 (0.668) | -0.059 (0.037) | -0.054** (0.022) | -0.314** (0.131) | -0.014 (0.018) | 0.228 (0.165) | 0.041* (0.025) | -0.027 (0.030) | 240.734 (370.262) | 102.005 (105.915) | 0.002 (0.007) | 0.003  (0.011) |
| Baseline Mean | 0.254 | 5.129 | 0.330 | 0.186 | 1.148 | 0.070 | 6.281 | 0.111 | 0.202 | 602.685 | 95.954 | 0.019 | 0.055 |
| Controls | Yes | Yes | Yes | Yes | Yes | Yes | Yes | Yes | Yes | Yes | Yes | Yes | Yes |
| F-Stat (First Stage) | 235.95 | 234.86 | 247.99 | 248.32 | 248.32 | 236.07 | 250.83 | 247.83 | 244.95 | 248.81 | 247.86 | 233.32 | 237.12 |
| R-squared | 0.344 | 0.336 | 0.263 | 0.216 | 0.237 | 0.043 | 0.050 | 0.012 | 0.032 | -0.019 | -0.022 | 0.001 | -0.004 |
| Observations | 18,975 | 17,494 | 21,850 | 20,951 | 20,951 | 16,792 | 20,155 | 21,814 | 21,508 | 21,628 | 21,474 | 18,365 | 18,492 |
|  |  |  |  |  |  |  |  |  |  |  |  |  |  |
|  | **Offer NRPS (=1 if at least 7 in community participate)** | | | | | | | | | | | | |
| NRPS Participation * Above60 b | 0.017 (0.029) | 0.918 (0.651) | -0.049 (0.036) | -0.043** (0.022) | -0.247* (0.127) | -0.010 (0.018) | 0.211 (0.162) | 0.028 (0.024) | -0.026 (0.030) | 79.385 (365.949) | 89.454 (105.823) | -0.001 (0.008) | -0.000  (0.013) |
| Baseline Mean | 0.254 | 5.129 | 0.330 | 0.186 | 1.148 | 0.070 | 6.281 | 0.111 | 0.202 | 602.685 | 95.954 | 0.019 | 0.055 |
| Controls | Yes | Yes | Yes | Yes | Yes | Yes | Yes | Yes | Yes | Yes | Yes | Yes | Yes |
| F-Stat (First Stage) | 250.85 | 249.50 | 265.83 | 265.51 | 265.51 | 246.78 | 267.79 | 266.00 | 264.09 | 267.58 | 264.98 | 254.16 | 259.11 |
| R-squared | 0.343 | 0.336 | 0.263 | 0.216 | 0.237 | 0.044 | 0.050 | 0.013 | 0.033 | -0.018 | -0.022 | 0.001 | -0.004 |
| Observations | 18,975 | 17,494 | 21,850 | 20,951 | 20,951 | 16,792 | 20,155 | 21,814 | 21,508 | 21,628 | 21,474 | 18,365 | 18,492 |
| Notes*:* (a) Our DDD coefficient (Policy instrument interacted with an indicator for being over 60 years old). The control group becomes individuals under the Age of 60 living in eligible communities that didn’t offer NRPS between 2011 and 2013. (b) Individual participation instrumented with the policy variable. Individual level controls: Marital Status (=1 if Married), Gender (=1 if Female), Education Levels (Base Group is illiterate with no formal education), # of Household Residents. *p< 0.10, **p< 0.05, ***p< 0.01. | | | | | | | | | | | | | |

# **Table B.10:** ITT and LATE Estimates on Direct Measures of Health with Age Group Clustered Robust Standard Errors.

|  | **Self-Reported Overall** | | **Mobility** | | | | | | | | **Affect** | | | | | | | | **Vision** | | | | | |
| --- | --- | --- | --- | --- | --- | --- | --- | --- | --- | --- | --- | --- | --- | --- | --- | --- | --- | --- | --- | --- | --- | --- | --- | --- |
|  | ***At Least Good* Health Status (Yes=1)** | | **Diff Jog 1km (Yes=1)** | | **Diff Walk 100m (Yes=1)** | | **Diff Climb Flight of Stairs (Yes=1)** | | **Mobility Index** | | **Everything Mostly an Effort (Yes=1)** | | **Rarely Happy (Yes=1)** | | **Mostly Lonely (Yes=1)** | | **Affect Index a** | | **Long Distance Vision** | | **Short Distance Vision** | | **Vision Index b** | |
|  | (1) | | (2) | | (3) | | (4) | | (5) | | (6) | | (7) | | (8) | | (9) | | (10) | | (11) | | (12) | |
| Panel A (ITT): |  | |  | |  | |  | |  | |  | |  | |  | |  | |  | |  | |  | |
| Offered NRPS * Above60c | 0.022 | | -0.024 | | -0.013 | | -0.057 | | -0.109 | | -0.022 | | -0.012 | | 0.005 | | -0.044 | | 0.036 | | 0.024 | | 0.088 | |
| *Comm Clusters* | (0.013)* | | (0.013)* | | (0.010) | | (0.015)*** | | (0.038)*** | | (0.012)* | | (0.013) | | (0.008) | | (0.034) | | (0.014)** | | (0.014) | | (0.035)** | |
| *Comm*Age* | (0.013)* | | (0.016) | | (0.012) | | (0.015)*** | | (0.043)** | | (0.012)* | | (0.013) | | (0.008) | | (0.036) | | (0.016)** | | (0.015) | | (0.038)** | |
| Baseline Mean | 0.252 | | 0.543 | | 0.172 | | 0.427 | | 0.000 | | 0.167 | | 0.248 | | 0.079 | | 0.000 | | 0.353 | | 0.328 | | 0.000 | |
| Controls | Yes | | Yes | | Yes | | Yes | | Yes | | Yes | | Yes | | Yes | | Yes | | Yes | | Yes | | Yes | |
| R-squared | 0.066 | | 0.153 | | 0.103 | | 0.116 | | 0.185 | | 0.052 | | 0.066 | | 0.056 | | 0.081 | | 0.091 | | 0.052 | | 0.084 | |
| Observations | 21,888 | | 21,189 | | 21,730 | | 21,400 | | 20,853 | | 20,047 | | 20,139 | | 20,094 | | 19,851 | | 20,466 | | 20,468 | | 20,450 | |
|  |  | |  | |  | |  | |  | |  | |  | |  | |  | |  | |  | |  | |
| Panel B (TOT): |  | |  | |  | |  | |  | |  | |  | |  | |  | |  | |  | |  | |
| NRPS Participation * Above60d | | 0.050 | | -0.052 | | -0.028 | | -0.127 | | -0.239 | | -0.049 | | -0.025 | | 0.011 | | -0.096 | | 0.079 | | 0.053 | | 0.195 | | |
| *Comm Clusters* | | (0.029)* | | (0.028)* | | (0.023) | | (0.035)*** | | (0.084)*** | | (0.026)* | | (0.029) | | (0.019) | | (0.075) | | (0.032)** | | (0.032) | | (0.079)** | | |
| *Comm*Age* | | (0.030)* | | (0.035) | | (0.026) | | (0.034)*** | | (0.094)** | | (0.027)* | | (0.029) | | (0.019) | | (0.080) | | (0.035)** | | (0.032) | | (0.084)** | | |
| Baseline Mean | 0.252 | | 0.543 | | 0.172 | | 0.427 | | 0.000 | | 0.167 | | 0.248 | | 0.079 | | 0.000 | | 0.353 | | 0.328 | | 0.000 | |
| Controls | Yes | | Yes | | Yes | | Yes | | Yes | | Yes | | Yes | | Yes | | Yes | | Yes | | Yes | | Yes | |
| F-Stat (First Stage) | 144.64 | | 145.34 | | 147.74 | | 145.94 | | 145.13 | | 149.56 | | 148.98 | | 147.93 | | 147.01 | | 156.31 | | 156.16 | | 156.30 | |
| R-squared | 0.065 | | 0.152 | | 0.102 | | 0.110 | | 0.182 | | 0.051 | | 0.065 | | 0.056 | | 0.080 | | 0.088 | | 0.051 | | 0.082 | |
| Observations | 21,888 | | 21,189 | | 21,730 | | 21,400 | | 20,853 | | 20,047 | | 20,139 | | 20,094 | | 19,851 | | 20,466 | | 20,468 | | 20,450 | |
| Notes*:* a) Measured in terms of difficulty. Low (or Negative) values denote less difficulty and better mobility/mood/emotion. (b) Positively coded where Higher values denote better vision. (c) Our DDD coefficient (Policy instrument interacted with an indicator for being over 60 years old). The control group becomes individuals under the Age of 60 living in eligible communities that didn’t offer NRPS between 2011 and 2013. (d) Individual participation instrumented with the policy variable. Also note that Long and Short Distance Vision are indicator variables equal to 1 if either is reported as *At Least Good.* Individual level controls: Marital Status (=1 if Married), Gender (=1 if Female), Education Levels (Base Group is illiterate with no formal education), # of Household Residents. *p< 0.10, **p< 0.05, ***p< 0.01. | | | | | | | | | | | | | | | | | | | | | | | | | |

# **Table B.11:** ITT and LATE Estimates on Indirect Measures of Health with Age Group Clustered Robust Standard Errors.

|  | **Self-Care** | | | | | | | | **Usual Activities** | | | | | | | | **Social Interaction** | | | | | | | |
| --- | --- | --- | --- | --- | --- | --- | --- | --- | --- | --- | --- | --- | --- | --- | --- | --- | --- | --- | --- | --- | --- | --- | --- | --- |
|  | **Diff Getting Dressed (Yes=1)** | | **Diff Taking Bath (Yes=1)** | | **Diff Eating (Yes=1)** | | **Self-Care Index a** | | **Diff Preparing Hot Meals (Yes=1)** | | **Diff Grocery Shopping (Yes=1)** | | **Diff Cleaning House (Yes=1)** | | **Usual Activities Index a** | | **Contact with Parents or In-Laws (Yes=1)** | | **Contact with Child over Phone/Email (Yes=1)** | | **Contact with Child in Person/Phone/ Email (Yes=1)** | | **Social Interaction Index b** | |
|  | (1) | | (2) | | (3) | | (4) | | (5) | | (6) | | (7) | | (8) | | (9) | | (10) | | (11) | | (12) | |
| Panel A (ITT): |  | |  | |  | |  | |  | |  | |  | |  | |  | |  | |  | |  | |
| Offered NRPS * Above60c | -0.015 | | -0.019 | | -0.020 | | -0.145 | | -0.017 | | -0.020 | | -0.015 | | -0.105 | | 0.045 | | -0.027 | | 0.005 | | 0.031 | |
| *Comm Clusters* | (0.008)** | | (0.009)** | | (0.006)*** | | (0.050)*** | | (0.010)* | | (0.009)** | | (0.010) | | (0.048)** | | (0.012)*** | | (0.022) | | (0.009) | | (0.049) | |
| *Comm*Age* | (0.008)* | | (0.009)** | | (0.006)*** | | (0.049)*** | | (0.010)* | | (0.009)** | | (0.010) | | (0.049)** | | (0.012)*** | | (0.019) | | (0.008) | | (0.043) | |
| Baseline Mean | 0.056 | | 0.071 | | 0.029 | | 0.000 | | 0.096 | | 0.098 | | 0.106 | | 0.000 | | 0.270 | | 0.523 | | 0.909 | | 0.000 | |
| Controls | Yes | | Yes | | Yes | | Yes | | Yes | | Yes | | Yes | | Yes | | Yes | | Yes | | Yes | | Yes | |
| R-squared | 0.035 | | 0.068 | | 0.026 | | 0.066 | | 0.066 | | 0.081 | | 0.061 | | 0.094 | | 0.211 | | 0.087 | | 0.101 | | 0.088 | |
| Observations | 21,669 | | 21,638 | | 21,670 | | 21,637 | | 21,795 | | 21,790 | | 21,824 | | 21,715 | | 20,971 | | 16,174 | | 21,246 | | 15,588 | |
|  |  | |  | |  | |  | |  | |  | |  | |  | |  | |  | |  | |  | |
| Panel B (TOT): |  | |  | |  | |  | |  | |  | |  | |  | |  | |  | |  | |  | |
| NRPS Participation * Above60 d | | -0.033 | | -0.041 | | -0.044 | | -0.320 | | -0.038 | | -0.043 | | -0.033 | | -0.231 | | 0.099 | | -0.058 | | 0.010 | | 0.067 | | |
| *Comm Clusters* | | (0.017)** | | (0.020)** | | (0.013)*** | | (0.112)*** | | (0.023)* | | (0.021)** | | (0.022) | | (0.107)** | | (0.027)*** | | (0.047) | | (0.020) | | (0.103) | | |
| *Comm*Age* | | (0.017)* | | (0.019)** | | (0.013)*** | | (0.108)*** | | (0.022)* | | (0.021)** | | (0.023) | | (0.107)** | | (0.027)*** | | (0.041) | | (0.018) | | (0.091) | | |
| Baseline Mean | | 0.056 | | 0.071 | | 0.029 | | 0.000 | | 0.096 | | 0.098 | | 0.106 | | 0.000 | | 0.270 | | 0.523 | | 0.909 | | 0.000 | | |
| Controls | | Yes | | Yes | | Yes | | Yes | | Yes | | Yes | | Yes | | Yes | | Yes | | Yes | | Yes | | Yes | | |
| F-Stat (First Stage) | | 251.37 | | 250.07 | | 251.39 | | 250.06 | | 250.04 | | 248.70 | | 248.82 | | 250.58 | | 254.89 | | 240.31 | | 245.85 | | 243.57 | | |
| R-squared | | 0.034 | | 0.066 | | 0.019 | | 0.062 | | 0.065 | | 0.079 | | 0.060 | | 0.091 | | 0.206 | | 0.086 | | 0.101 | | 0.087 | | |
| Observations | | 21,669 | | 21,638 | | 21,670 | | 21,637 | | 21,795 | | 21,790 | | 21,824 | | 21,715 | | 20,971 | | 16,174 | | 21,246 | | 15,588 | | |
| Notes*:* (a) Measured in terms of difficulty. Low (or Negative) values denote less difficulty and better mood/emotion. (b) Positively coded where Higher values denote more social interaction. (c) Our DDD coefficient (Policy instrument interacted with an indicator for being over 60 years old). The control group becomes individuals under the Age of 60 living in eligible communities that didn’t offer NRPS between 2011 and 2013. (d) Individual participation instrumented with the policy variable. Individual level controls: Marital Status (=1 if Married), Gender (=1 if Female), Education Levels (Base Group is illiterate with no formal education), # of Household Residents. *p< 0.10, **p< 0.05, ***p< 0.01. | | | | | | | | | | | | | | | | | | | | | | | | | |

# **Table B.12**: ITT and LATE Estimates on Health Mechanisms, Healthcare Utilization and Disease States with Age Group Clustered Robust Standard Errors.

|  | **Health Behavior** | | | | | | | **Health Utilization** | | | | **Disease States** | |
| --- | --- | --- | --- | --- | --- | --- | --- | --- | --- | --- | --- | --- | --- |
|  | **Currently Smoking (Yes=1)** | **Number of Cigarettes per Day** | **Drink Alcohol in Past Year (Yes=1)** | **Drink Regularly in Past Year (Yes=1)** | **Drink Frequency in Past Year** | **Underweight (Yes=1)** | **Sleep Duration (Hours)** | **Hospital Visit Last Year (Yes=1)** | **Doctor Visit Last Month (Yes=1)** | **Hospital Out-of-Pocket (Yuan)** | **Doctor Out-of-Pocket (Yuan)** | **Diagnosed w/ Diabetes Past Year (Yes=1)** | **Diagnosed w/ Hypertension Past Year (Yes=1)** |
|  | (1) | (2) | (3) | (4) | (5) | (6) | (7) | (8) | (9) | (10) | (11) | (12) | (13) |
| Panel A (ITT): |  |  |  |  |  |  |  |  |  |  |  |  |  |
| Offered NRPS * Above60c | -0.007 | 0.705 | -0.011 | -0.025 | -0.136 | -0.007 | 0.105 | 0.014 | -0.018 | 95.824 | 72.338 | 0.001 | 0.001 |
| *Comm Clusters* | (0.010) | (0.331)** | (0.011) | (0.009)*** | (0.056)** | (0.008) | (0.076) | (0.010) | (0.012) | (158.902) | (44.753) | (0.003) | (0.005) |
| *Comm*Age* | (0.013) | (0.330)** | (0.014) | (0.011)** | (0.068)** | (0.009) | (0.070) | (0.010) | (0.013) | (145.010) | (42.987)* | (0.005) | (0.008) |
| Baseline Mean | 0.254 | 5.129 | 0.330 | 0.186 | 1.148 | 0.070 | 6.281 | 0.111 | 0.202 | 602.685 | 95.954 | 0.019 | 0.055 |
| Controls | Yes | Yes | Yes | Yes | Yes | Yes | Yes | Yes | Yes | Yes | Yes | Yes | Yes |
| R-squared | 0.344 | 0.336 | 0.263 | 0.217 | 0.238 | 0.044 | 0.051 | 0.013 | 0.033 | -0.018 | -0.021 | 0.001 | -0.004 |
| Observations | 18,975 | 17,494 | 21,850 | 20,951 | 20,951 | 16,792 | 20,155 | 21,814 | 21,508 | 21,628 | 21,474 | 18,365 | 18,492 |
| Panel B (TOT): |  |  |  |  |  |  |  |  |  |  |  |  |  |
| NRPS Participation * Above60 b | -0.016 | 1.539 | -0.024 | -0.056 | -0.304 | -0.015 | 0.231 | 0.030 | -0.039 | 210.812 | 160.146 | 0.002 | 0.003 |
| *Comm Clusters* | (0.023) | (0.709)** | (0.024) | (0.021)*** | (0.128)** | (0.018) | (0.170) | (0.021) | (0.026) | (349.876) | (99.155) | (0.007) | (0.011) |
| *Comm*Age* | (0.028) | (0.718)** | (0.031) | (0.026)** | (0.153)** | (0.020) | (0.155) | (0.023) | (0.030) | (319.028) | (95.254)* | (0.010) | (0.017) |
| Baseline Mean | 0.254 | 5.129 | 0.330 | 0.186 | 1.148 | 0.070 | 6.281 | 0.111 | 0.202 | 602.685 | 95.954 | 0.019 | 0.055 |
| Controls | Yes | Yes | Yes | Yes | Yes | Yes | Yes | Yes | Yes | Yes | Yes | Yes | Yes |
| F-Stat (First Stage) | 235.04 | 232.69 | 248.43 | 248.91 | 248.91 | 235.38 | 251.71 | 248.59 | 245.84 | 249.45 | 248.57 | 234.82 | 238.49 |
| R-squared | 0.344 | 0.335 | 0.263 | 0.216 | 0.237 | 0.043 | 0.050 | 0.013 | 0.032 | -0.019 | -0.022 | 0.001 | -0.004 |
| Observations | 18,975 | 17,494 | 21,850 | 20,951 | 20,951 | 16,792 | 20,155 | 21,814 | 21,508 | 21,628 | 21,474 | 18,365 | 18,492 |
| Notes:(a) Our DDD coefficient (Policy instrument interacted with an indicator for being over 60 years old). The control group becomes individuals under the Age of 60 living in eligible communities that didn’t offer NRPS between 2011 and 2013. (b) Individual participation instrumented with the policy variable. Individual level controls: Marital Status (=1 if Married), Gender (=1 if Female), Education Levels (Base Group is illiterate with no formal education), # of Household Residents. *p< 0.10, **p< 0.05, ***p< 0.01. | | | | | | | | | | | | | |

# **Table B.13:** ITT and LATE Estimates on Direct Measures of Health. City-Level Analysis (Heilongjiang).

|  | | **Self-Reported Overall** | | | **Mobility** | | | | | | | | | | | | **Affect** | | | | | | | | | | | | **Vision** | | | | | | | | |
| --- | --- | --- | --- | --- | --- | --- | --- | --- | --- | --- | --- | --- | --- | --- | --- | --- | --- | --- | --- | --- | --- | --- | --- | --- | --- | --- | --- | --- | --- | --- | --- | --- | --- | --- | --- | --- | --- |
|  | | ***At Least Good* Health Status (Yes=1)** | | | **Diff Jog 1km (Yes=1)** | | | **Diff Walk 100m (Yes=1)** | | | **Diff Climb Flight of Stairs (Yes=1)** | | | **Mobility Index** | | | **Everything Mostly an Effort (Yes=1)** | | | **Rarely Happy (Yes=1)** | | | **Mostly Lonely (Yes=1)** | | | **Affect Index a** | | | **Long Distance Vision** | | | **Short Distance Vision** | | | **Vision Index b** | | |
|  | | (1) | | | (2) | | | (3) | | | (4) | | | (5) | | | (6) | | | (7) | | | (8) | | | (9) | | | (10) | | | (11) | | | (12) | | |
| Panel A (ITT): | |  | | |  | | |  | | |  | | |  | | |  | | |  | | |  | | |  | | |  | | |  | | |  | | |
|  | | **CHARLS Data** | | | | | | | | | | | | | | | | | | | | | | | | | | | | | | | | | | | |
| Offered NRPS * Above60c | | -0.596**  (0.293) | | | 0.600** (0.280) | | | 0.116 (0.386) | | | 0.845*** (0.318) | | | 1.864* (1.085) | | | 0.492 (0.299) | | | -0.156 (0.285) | | | -0.223 (0.307) | | | 0.119 (0.896) | | | -0.425 (0.394) | | | -0.327 (0.449) | | | -1.121 (1.234) | | |
| Baseline Mean | | 0.252 | | | 0.543 | | | 0.172 | | | 0.427 | | | 0.000 | | | 0.167 | | | 0.248 | | | 0.079 | | | 0.000 | | | 0.353 | | | 0.328 | | | 0.000 | | |
| Controls | | Yes | | | Yes | | | Yes | | | Yes | | | Yes | | | Yes | | | Yes | | | Yes | | | Yes | | | Yes | | | Yes | | | Yes | | |
| R-squared | | 0.042 | | | 0.158 | | | 0.037 | | | 0.167 | | | 0.150 | | | 0.003 | | | 0.017 | | | 0.127 | | | 0.091 | | | 0.097 | | | 0.006 | | | 0.063 | | |
| Observations | | 185 | | | 180 | | | 180 | | | 180 | | | 175 | | | 168 | | | 168 | | | 168 | | | 168 | | | 172 | | | 172 | | | 172 | | |
|  | |  | | |  | | |  | | |  | | |  | | |  | | |  | | |  | | |  | | |  | | |  | | |  | | |
|  | | **Admin Data** | | | | | | | | | | | | | | | | | | | | | | | | | | | | | | | | | | | |
| Offered NRPS * Above60c | | -0.049 (0.189) | | | 0.127 (0.213) | | | 0.122 (0.182) | | | 0.255 (0.212) | | | 0.623 (0.617) | | | 0.122 (0.189) | | | -0.128 (0.144) | | | 0.074 (0.117) | | | 0.215 (0.436) | | | -0.213 (0.200) | | | -0.329 (0.221) | | | -0.811 (0.508) | | |
| Baseline Mean | | 0.252 | | | 0.543 | | | 0.172 | | | 0.427 | | | 0.000 | | | 0.167 | | | 0.248 | | | 0.079 | | | 0.000 | | | 0.353 | | | 0.328 | | | 0.000 | | |
| Controls | | Yes | | | Yes | | | Yes | | | Yes | | | Yes | | | Yes | | | Yes | | | Yes | | | Yes | | | Yes | | | Yes | | | Yes | | |
| R-squared | | 0.029 | | | 0.150 | | | 0.039 | | | 0.157 | | | 0.145 | | | -0.001 | | | 0.021 | | | 0.126 | | | 0.092 | | | 0.100 | | | 0.020 | | | 0.074 | | |
| Observations | | 185 | | | 180 | | | 180 | | | 180 | | | 175 | | | 168 | | | 168 | | | 168 | | | 168 | | | 172 | | | 172 | | | 172 | | |
|  | |  | | |  | | |  | | |  | | |  | | |  | | |  | | |  | | |  | | |  | | |  | | |  | | |
| Panel B (TOT): | |  | | |  | | |  | | |  | | |  | | |  | | |  | | |  | | |  | | |  | | |  | | |  | | |
|  | | **CHARLS Data** | | | | | | | | | | | | | | | | | | | | | | | | | | | | | | | | | | | |
| NRPS Participation * Above60d | | | -0.940 (0.620) | | | 0.922 (0.621) | | | 0.186 (0.627) | | | 1.310* (0.741) | | | 2.840 (2.097) | | | 0.983 (0.793) | | | -0.312 (0.541) | | | -0.445 (0.568) | | | 0.237 (1.845) | | | -0.818 (0.883) | | | -0.630 (0.928) | | | -2.160 (2.652) | | | |
| Baseline Mean | | 0.252 | | | 0.543 | | | 0.172 | | | 0.427 | | | 0.000 | | | 0.167 | | | 0.248 | | | 0.079 | | | 0.000 | | | 0.353 | | | 0.328 | | | 0.000 | | |
| Controls | | Yes | | | Yes | | | Yes | | | Yes | | | Yes | | | Yes | | | Yes | | | Yes | | | Yes | | | Yes | | | Yes | | | Yes | | |
| F-Stat (First Stage) | | 12.92 | | | 13.06 | | | 11.66 | | | 14.30 | | | 14.25 | | | 10.22 | | | 10.22 | | | 10.22 | | | 10.22 | | | 10.07 | | | 10.07 | | | 10.07 | | |
| R-squared | | -0.422 | | | -0.240 | | | 0.045 | | | -0.486 | | | -0.198 | | | -0.433 | | | 0.019 | | | -0.154 | | | 0.085 | | | -0.178 | | | -0.184 | | | -0.278 | | |
| Observations | | 185 | | | 180 | | | 180 | | | 180 | | | 175 | | | 168 | | | 168 | | | 168 | | | 168 | | | 172 | | | 172 | | | 172 | | |
|  | |  | | |  | | |  | | |  | | |  | | |  | | |  | | |  | | |  | | |  | | |  | | |  | | |
|  | | **Admin Data** | | | | | | | | | | | | | | | | | | | | | | | | | | | | | | | | | | | |
| NRPS Participation * Above60d | | 0.121 (0.470) | | | | -0.324 (0.516) | | | -0.283 (0.444) | | | -0.660 (0.566) | | | -1.624 (1.648) | | | -0.243 (0.397) | | | 0.255 (0.323) | | | -0.147 (0.244) | | | -0.428 (0.889) | | | 0.422 (0.404) | | | 0.652 (0.551) | | | 1.607 (1.211) | | | |
| Baseline Mean | | 0.252 | | | 0.543 | | | 0.172 | | | 0.427 | | | 0.000 | | | 0.167 | | | 0.248 | | | 0.079 | | | 0.000 | | | 0.353 | | | 0.328 | | | 0.000 | | |
| Controls | | Yes | | | Yes | | | Yes | | | Yes | | | Yes | | | Yes | | | Yes | | | Yes | | | Yes | | | Yes | | | Yes | | | Yes | | |
| F-Stat (First Stage) | | 13.36 | | | 13.32 | | | 12.31 | | | 14.03 | | | 13.72 | | | 13.43 | | | 13.43 | | | 13.43 | | | 13.43 | | | 13.32 | | | 13.32 | | | 13.32 | | |
| R-squared | | 0.023 | | | 0.131 | | | -0.046 | | | 0.030 | | | 0.034 | | | -0.056 | | | -0.105 | | | 0.089 | | | 0.079 | | | 0.052 | | | -0.123 | | | -0.057 | | |
| Observations | 185 | | | 180 | | | 180 | | | 180 | | | 175 | | | 168 | | | 168 | | | 168 | | | 168 | | | 172 | | | 172 | | | 172 | | |
| Notes*:* a) Measured in terms of difficulty. Low (or Negative) values denote less difficulty and better mobility/mood/emotion. (b) Positively coded where Higher values denote better vision. (c) Our DDD coefficient (Policy instrument interacted with an indicator for being over 60 years old). The control group becomes individuals under the Age of 60 living in eligible communities that didn’t offer NRPS between 2011 and 2013. (d) Individual participation instrumented with the policy variable. Also note that Long and Short Distance Vision are indicator variables equal to 1 if either is reported as *At Least Good.* Individual level controls: Marital Status (=1 if Married), Gender (=1 if Female), Education Levels (Base Group is illiterate with no formal education), # of Household Residents. | | | | | | | | | | | | | | | | | | | | | | | | | | | | | | | | | | | | | | |

# **Table B.14:** ITT and LATE Estimates on Indirect Measures of Health. City-Level Analysis (Heilongjiang).

|  | **Self-Care** | | | | | | | | | **Usual Activities** | | | | | | | | | | **Social Interaction** | | | | | | | | | | | | | |
| --- | --- | --- | --- | --- | --- | --- | --- | --- | --- | --- | --- | --- | --- | --- | --- | --- | --- | --- | --- | --- | --- | --- | --- | --- | --- | --- | --- | --- | --- | --- | --- | --- | --- |
|  | **Diff Getting Dressed (Yes=1)** | | **Diff Taking Bath (Yes=1)** | | **Diff Eating (Yes=1)** | | **Self-Care Index a** | | | **Diff Preparing Hot Meals (Yes=1)** | | | | **Diff Grocery Shopping (Yes=1)** | | **Diff Cleaning House (Yes=1)** | | **Usual Activities Index a** | | **Contact with Parents or In-Laws (Yes=1)** | | **Contact with Child over Phone/Email (Yes=1)** | | | | **Contact with Child in Person/Phone/ Email (Yes=1)** | | | | **Social Interaction Index b** | | | |
|  | (1) | | (2) | | (3) | | (4) | | | (5) | | | | (6) | | (7) | | (8) | | (9) | | (10) | | | | (11) | | | | (12) | | | |
| Panel A (ITT): |  | |  | |  | |  | | |  | | | |  | |  | |  | |  | |  | | | |  | | | |  | | | |
|  | **CHARLS Data** | | | | | | | | | | | | | | | | | | | | | | | | | | | | | | | | |
| Offered NRPS * Above60c | 0.181* (0.094) | | -0.179 (0.291) | | 0.001 (0.025) | | 0.057 (0.813) | | | 0.209 (0.231) | | | | 0.267 (0.240) | | -0.041 (0.320) | | 0.846 (1.341) | | -1.165*** (0.393) | | -1.367*** (0.382) | | | | -0.097* (0.054) | | | | -2.245*** (0.614) | | | |
| Baseline Mean | 0.056 | | 0.071 | | 0.029 | | 0.000 | | | 0.096 | | | | 0.098 | | 0.106 | | 0.000 | | 0.270 | | 0.523 | | | | 0.909 | | | | 0.000 | | | |
| Controls | Yes | | Yes | | Yes | | Yes | | | Yes | | | | Yes | | Yes | | Yes | | Yes | | Yes | | | | Yes | | | | Yes | | | |
| R-squared | 0.035 | | 0.075 | | -0.027 | | 0.056 | | | 0.088 | | | | 0.105 | | 0.057 | | 0.109 | | 0.217 | | 0.221 | | | | -0.005 | | | | 0.243 | | | |
| Observations | 183 | | 183 | | 183 | | 183 | | | 185 | | | | 184 | | 185 | | 184 | | 172 | | 138 | | | | 177 | | | | 128 | | | |
|  |  | |  | |  | |  | | |  | | | |  | |  | |  | |  | |  | | | |  | | | |  | | | |
|  | **Admin Data** | | | | | | | | | | | | | | | | | | | | | | | | | | | | | | | | |
| Offered NRPS * Above60c | 0.127 (0.140) | | 0.277* (0.144) | | 0.017 (0.037) | | 1.029 (0.717) | | | 0.107 (0.170) | | | | 0.105 (0.198) | | 0.231 (0.179) | | 0.866 (0.848) | | 0.158 (0.155) | | -0.209 (0.229) | | | | -0.051  (0.077) | | | | -0.277 (0.430) | | | |
| Baseline Mean | 0.056 | | 0.071 | | 0.029 | | 0.000 | | | 0.096 | | | | 0.098 | | 0.106 | | 0.000 | | 0.270 | | 0.523 | | | | 0.909 | | | | 0.000 | | | |
| Controls | Yes | | Yes | | Yes | | Yes | | | Yes | | | | Yes | | Yes | | Yes | | Yes | | Yes | | | | Yes | | | | Yes | | | |
| R-squared | 0.039 | | 0.101 | | -0.026 | | 0.073 | | | 0.089 | | | | 0.104 | | 0.072 | | 0.116 | | 0.183 | | 0.183 | | | | -0.004 | | | | 0.211 | | | |
| Observations | 183 | | 183 | | 183 | | 183 | | | 185 | | | | 184 | | 185 | | 184 | | 172 | | 138 | | | | 177 | | | | 128 | | | |
|  |  | |  | |  | |  | | |  | | | |  | |  | |  | |  | |  | | | |  | | | |  | | | |
| Panel B (TOT): |  | |  | |  | |  | | |  | | | |  | |  | |  | |  | |  | | | |  | | | |  | | | |
|  | **CHARLS Data** | | | | | | | | | | | | | | | | | | | | | | | | | | | | | | | | |
| NRPS Participation * Above60 d | | 0.284* (0.154) | | -0.280 (0.460) | | 0.001 (0.039) | | | 0.090 (1.277) | | | 0.329 (0.391) | | | 0.415 (0.398) | | -0.064 (0.503) | | 1.314 (2.161) | | -1.380*** (0.431) | | | -2.344* (1.311) | | | | -0.149  (0.096) | | | | -2.870** (1.131) | | | | |
| Baseline Mean | | 0.056 | | 0.071 | | 0.029 | | | 0.000 | | 0.096 | | | | 0.098 | | 0.106 | | 0.000 | | 0.270 | | 0.523 | | | | 0.909 | | | | 0.000 | | | | | | |
| Controls | | Yes | | Yes | | Yes | | | Yes | | Yes | | | | Yes | | Yes | | Yes | | Yes | | Yes | | | | Yes | | | | Yes | | | | | | |
| F-Stat (First Stage) | | 12.99 | | 12.99 | | 12.99 | | | 12.99 | | 12.92 | | | | 12.91 | | 12.92 | | 12.91 | | 12.70 | | 19.50 | | | | 12.96 | | | | 20.49 | | | | | | |
| R-squared | | 0.001 | | -0.040 | | -0.028 | | | 0.058 | | -0.031 | | | | 0.067 | | 0.055 | | 0.069 | | -0.432 | | -1.871 | | | | 0.015 | | | | -0.504 | | | | | | |
| Observations | | 183 | | 183 | | 183 | | | 183 | | 185 | | | | 184 | | 185 | | 184 | | 172 | | 138 | | | | 177 | | | | 128 | | | | | | |
|  |  | |  | |  | |  | | |  | | | |  | |  | |  | |  | |  | | | |  | | | |  | | | |
|  | **Admin Data** | | | | | | | | | | | | | | | | | | | | | | | | | | | | | | | | |
| NRPS Participation * Above60 d | | -0.316 (0.395) | | -0.687 (0.493) | | -0.042 (0.092) | | -2.556 (2.221) | | | | | -0.266 (0.405) | | -0.263 (0.539) | | -0.575 (0.443) | | -2.177 (2.219) | | -0.372 (0.392) | | | | 0.699  (0.969) | | | | 0.144  (0.243) | | | | 0.800 (1.416) | | |
| Baseline Mean | | 0.056 | | 0.071 | | 0.029 | | 0.000 | | | | | 0.096 | | 0.098 | | 0.106 | | 0.000 | | 0.270 | | | | 0.523 | | | | 0.909 | | | | 0.000 | | |
| Controls | | Yes | | Yes | | Yes | | Yes | | | | | Yes | | Yes | | Yes | | Yes | | Yes | | | | Yes | | | | Yes | | | | Yes | | |
| F-Stat (First Stage) | | 13.34 | | 13.34 | | 13.34 | | 13.34 | | | | | 13.36 | | 13.38 | | 13.36 | | 13.38 | | 13.48 | | | | 18.63 | | | | 12.89 | | | | 19.26 | | |
| R-squared | | -0.172 | | -0.473 | | -0.008 | | -0.268 | | | | | 0.012 | | 0.011 | | -0.190 | | -0.081 | | 0.166 | | | | -0.116 | | | | -0.180 | | | | 0.055 | | |
| Observations | | 183 | | 183 | | 183 | | 183 | | | | | 185 | | 184 | | 185 | | 184 | | 172 | | | | 138 | | | | 177 | | | | 128 | | |
| Notes*:* (a) Measured in terms of difficulty. Low (or Negative) values denote less difficulty and better mood/emotion. (b) Positively coded where Higher values denote more social interaction. (c) Our DDD coefficient (Policy instrument interacted with an indicator for being over 60 years old). The control group becomes individuals under the Age of 60 living in eligible communities that didn’t offer NRPS between 2011 and 2013. (d) Individual participation instrumented with the policy variable. Individual level controls: Marital Status (=1 if Married), Gender (=1 if Female), Education Levels (Base Group is illiterate with no formal education), # of Household Residents. | | | | | | | | | | | | | | | | | | | | | | | | | | | | | | | | | | |

# **Table B.15**: ITT and LATE Estimates on Health Mechanisms, Healthcare Utilization and Disease States. City-Level Analysis (Heilongjiang)

|  | **Health Behavior** | | | | | | | **Health Utilization** | | | |  | |
| --- | --- | --- | --- | --- | --- | --- | --- | --- | --- | --- | --- | --- | --- |
|  | **Currently Smoking (Yes=1)** | **Number of Cigarettes per Day** | **Drink Alcohol in Past Year (Yes=1)** | **Drink Regularly in Past Year (Yes=1)** | **Drink Frequency in Past Year** | **Underweight (Yes=1)** | **Sleep Duration (Hours)** | **Hospital Visit Last Year (Yes=1)** | **Doctor Visit Last Month (Yes=1)** | **Hospital Out-of-Pocket (Yuan)** | **Doctor Out-of-Pocket (Yuan)** |  |  |
|  | (1) | (2) | (3) | (4) | (5) | (6) | (7) | (8) | (9) | (10) | (11) |  |  |
| Panel A (ITT): |  |  |  |  |  |  |  |  |  |  |  |  |  |
|  | **CHARLS Data** | | | | | | | | | | | | |
| Offered NRPS * Above60c | 0.211 (0.516) | 9.830 (15.346) | 0.255 (0.343) | -0.063 (0.312) | 0.189 (2.292) | -0.072 (0.070) | 1.730 (1.842) | 0.395 (0.371) | 0.137 (0.198) | -335.667 (1907.944) | 225.485 (148.564) |  |  |
| Baseline Mean | 0.254 | 5.129 | 0.330 | 0.186 | 1.148 | 0.070 | 6.281 | 0.111 | 0.202 | 602.685 | 95.954 |  |  |
| Controls | Yes | Yes | Yes | Yes | Yes | Yes | Yes | Yes | Yes | Yes | Yes |  |  |
| R-squared | 0.181 | 0.194 | 0.359 | 0.287 | 0.279 | 0.141 | 0.055 | 0.035 | -0.003 | -0.007 | 0.375 |  |  |
| Observations | 181 | 152 | 185 | 181 | 181 | 146 | 166 | 185 | 178 | 184 | 181 |  |  |
|  |  |  |  |  |  |  |  |  |  |  |  |  |  |
|  | **Admin Data** | | | | | | | | | | | | |
| Offered NRPS * Above60c | -0.069 (0.200) | -3.575 (6.470) | -0.061 (0.174) | -0.152 (0.169) | -1.678 (1.080) | 0.092 (0.058) | -0.182 (0.720) | -0.166 (0.154) | 0.016 (0.156) | 796.174 (2468.481) | -29.130 (80.924) |  |  |
| Baseline Mean | 0.254 | 5.129 | 0.330 | 0.186 | 1.148 | 0.070 | 6.281 | 0.111 | 0.202 | 602.685 | 95.954 |  |  |
| Controls | Yes | Yes | Yes | Yes | Yes | Yes | Yes | Yes | Yes | Yes | Yes |  |  |
| R-squared | 0.181 | 0.192 | 0.358 | 0.291 | 0.291 | 0.150 | 0.049 | 0.034 | -0.004 | -0.007 | 0.374 |  |  |
| Observations | 181 | 152 | 185 | 181 | 181 | 146 | 166 | 185 | 178 | 184 | 181 |  |  |
| Panel B (TOT): |  |  |  |  |  |  |  |  |  |  |  |  |  |
|  | **CHARLS Data** | | | | | | | | | | | | |
| NRPS Participation * Above60 b | 0.392  (0.960) | 23.187 (33.908) | 0.403 (0.559) | -0.114 (0.573) | 0.341 (4.114) | -0.157 (0.159) | 3.303 (2.557) | 0.622 (0.661)) | 0.223 (0.315) | -532.745 (2980.733) | 347.437 (251.141) |  |  |
| Baseline Mean | 0.254 | 5.129 | 0.330 | 0.186 | 1.148 | 0.070 | 6.281 | 0.111 | 0.202 | 602.685 | 95.954 |  |  |
| Controls | Yes | Yes | Yes | Yes | Yes | Yes | Yes | Yes | Yes | Yes | Yes |  |  |
| F-Stat (First Stage) | 10.97 | 5.91 | 12.92 | 12.80 | 12.80 | 11.64 | 10.25 | 12.92 | 13.21 | 11.31 | 13.54 |  |  |
| R-squared | 0.116 | 0.042 | 0.285 | 0.293 | 0.274 | 0.090 | -0.286 | -0.393 | -0.060 | -0.009 | 0.332 |  |  |
| Observations | 181 | 152 | 185 | 181 | 181 | 146 | 166 | 185 | 178 | 184 | 181 |  |  |
|  |  |  |  |  |  |  |  |  |  |  |  |  |  |
|  | **Admin Data** | | | | | | | | | | | | |
| NRPS Participation * Above60 b | 0.143  (0.431) | 5.710 (10.288) | 0.152 (0.444) | 0.356 (0.455) | 3.930 (3.248) | -0.156 (0.108) | 0.361 (1.421) | 0.413 (0.447) | -0.041 (0.414) | -1909.664 (5837.999) | 75.886 (212.180) |  |  |
| Baseline Mean | 0.254 | 5.129 | 0.330 | 0.186 | 1.148 | 0.070 | 6.281 | 0.111 | 0.202 | 602.685 | 95.954 |  |  |
| Controls | Yes | Yes | Yes | Yes | Yes | Yes | Yes | Yes | Yes | Yes | Yes |  |  |
| F-Stat (First Stage) | 13.61 | 9.28 | 13.36 | 13.84 | 13.84 | 15.15 | 13.45 | 13.36 | 13.49 | 12.06 | 13.83 |  |  |
| R-squared | 0.169 | 0.211 | 0.343 | 0.197 | 0.062 | 0.091 | 0.050 | -0.175 | -0.001 | -0.020 | 0.372 |  |  |
| Observations | 181 | 152 | 185 | 181 | 181 | 146 | 166 | 185 | 178 | 184 | 181 |  |  |
| Notes*:* (a) Our DDD coefficient (Policy instrument interacted with an indicator for being over 60 years old). The control group becomes individuals under the Age of 60 living in eligible communities that didn’t offer NRPS between 2011 and 2013. (b) Individual participation instrumented with the policy variable. Individual level controls: Marital Status (=1 if Married), Gender (=1 if Female), Education Levels (Base Group is illiterate with no formal education), # of Household Residents. | | | | | | | | | | | | | |
